# Supplementary material for: Mn(OAc)3-mediated phosphonation–lactonization of alkenoic acids: synthesis of phosphono-γ-butyrolactones
Source: Royal Society of Chemistry journal article supplement (doi:10.1039/c4cc07978g), 2014-12-08
Supplement: c4cc07978g1.pdf [file c4cc07978g1.pdf]

## Electronic Supplementary Information

for

### **Mn(OAc)<sub>3</sub>–Mediated Phosphonation–Lactonization of Alkenoic**

### **Acids: Synthesis of Phosphono- $\gamma$ -butyrolactones**

Yuzhen Gao,<sup>a</sup> Xueqin Li,<sup>a</sup> Jian Xu,<sup>a</sup> Yile Wu,<sup>a</sup> Weizhu Chen,<sup>a,b</sup> Guo Tang,<sup>a,\*</sup> and Yufen Zhao<sup>a,c</sup>

#### Table of Contents

|                                                                                             |     |
|---------------------------------------------------------------------------------------------|-----|
| 1. General.....                                                                             | S2  |
| 2. Experimental procedure for the synthesis of Mn(OAc) <sub>3</sub> ·2H <sub>2</sub> O..... | S2  |
| 3. Experimental procedure for the phosphonylation of alkenoic acids.....                    | S2  |
| 4. Spectral data.....                                                                       | S3  |
| 5. <sup>1</sup> H and <sup>13</sup> C NMR spectra.....                                      | S13 |
| 6. Crystallographic Data for 5o.....                                                        | S42 |

### 1. General:

All reactions were carried out under N<sub>2</sub>. Unless otherwise noted, all reagents were obtained from commercial suppliers and used without further purification. <sup>1</sup>H NMR (400 MHz) and <sup>13</sup>C NMR (100 MHz) spectra were measured on Bruker AVIII 400M spectrometers with CDCl<sub>3</sub> as solvent and tetramethylsilane (TMS) as internal standard or 85% H<sub>3</sub>PO<sub>4</sub> as external standard for <sup>31</sup>P NMR (162 MHz). Chemical shifts were reported in units (ppm) by assigning TMS resonance in the <sup>1</sup>H spectrum as 0.00 ppm and CDCl<sub>3</sub> resonance in the <sup>13</sup>C spectrum as 77.23 ppm. All coupling constants (*J* values) were reported in Hertz (Hz). Chemical shifts of common trace <sup>1</sup>H NMR impurities (ppm): H<sub>2</sub>O: 1.56, CHCl<sub>3</sub>: 7.26, DMSO: 2.50. Column chromatography was performed on silica gel 300-400 mesh. The CAS number of the known compound was listed. The unknown products were further characterized by HRMS-ESI.

### 2. Experimental procedure for the synthesis of Mn(OAc)<sub>3</sub>·2H<sub>2</sub>O

The Mn(OAc)<sub>3</sub>·2H<sub>2</sub>O was prepared by heating a mixture of 125 mL of acetic acid and 12 g of Mn(OAc)<sub>2</sub>·4H<sub>2</sub>O to reflux for 20 min, then slowly adding 2.0 g of KMnO<sub>4</sub>. After refluxing for an additional 30 min, the mixture was cooled to room temperature and add a mixture of 20 mL of water and 20 mL of acetic anhydride. The manganic acetate was filtered off after 2 h, washed with cold acetic acid and diethyl ether, and then air dried.

### 3. Experimental procedure for the phosphorylation of alkenoic acids

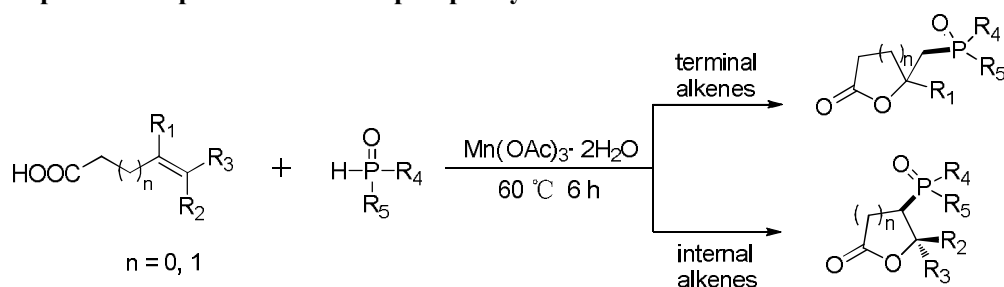

An oven-dried Schlenk tube containing Mn(OAc)<sub>3</sub>·2H<sub>2</sub>O (0.9 mmol) was evacuated and purged with nitrogen three times. Alkenoic acids (0.30 mmol), *H*-phosphonate (0.6 mmol) and CH<sub>3</sub>COOH (2 mL) were sequentially added to the system at room temperature. The reaction mixture was heated with stirring at 60 °C for 8 hours. The reaction solution was concentrated in vacuo and then added 15 mL saturated sodium bicarbonate solution and extracted with EtOAc (3×10 mL). The combined organic layer was dried over MgSO<sub>4</sub>, filtered and concentrated in vacuo. The residue was purified by silica gel column chromatography using petroleum ether–AcOEt (3:1-1:1, v/v) as the eluent to give the corresponding products.

#### 4. Spectral data

##### Diisopropyl ((5-oxo-2-phenyltetrahydrofuran-2-yl)methyl)phosphonate (3a)

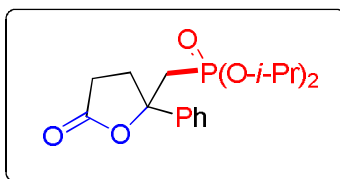

Yellow solid.  $^1\text{H}$  NMR (400 MHz,  $\text{CDCl}_3$ )  $\delta$  (ppm) 7.40 – 7.39 (m, 2H), 7.35 – 7.31 (m, 2H), 7.28 – 7.24 (m, 1H), 4.73 – 4.63 (m, 1H), 4.59 – 4.50 (m, 1H), 3.06 – 2.98 (m, 1H), 2.73 – 2.64 (m, 1H), 2.61 – 2.54 (m, 1H), 2.46 (d,  $J = 18.7$  Hz, 2H), 2.42 – 2.35 (m, 1H), 1.27 (d,  $J = 6.2$  Hz, 6H), 1.18 (d,  $J = 6.3$  Hz, 3H), 1.14 (d,  $J = 6.3$  Hz, 3H).  $^{13}\text{C}$  NMR (100 MHz,  $\text{CDCl}_3$ )  $\delta$  (ppm) 176.0 (s), 143.7 (d,  $J = 9.6$  Hz), 128.6 (s), 128.0 (s), 124.7 (s), 85.7 (d,  $J = 2.4$  Hz), 71.1 (d,  $J = 6.8$  Hz), 70.7 (d,  $J = 6.6$  Hz), 40.6 (d,  $J = 141.1$  Hz), 33.7 (d,  $J = 2.5$  Hz), 28.7 (s), 24.14 (d,  $J = 3.4$  Hz), 23.9 (m).  $^{31}\text{P}$  NMR (162 MHz,  $\text{CDCl}_3$ )  $\delta$  (ppm) 23.4. HRMS-ESI:  $m/z$  341.1504 ( $[\text{M}+\text{H}]^+$ ),  $\text{C}_{17}\text{H}_{26}\text{O}_5\text{P}^+$  calcd. 341.1512).

##### Diisopropyl ((2-(4-fluorophenyl)-5-oxotetrahydrofuran-2-yl)methyl)phosphonate (3b)

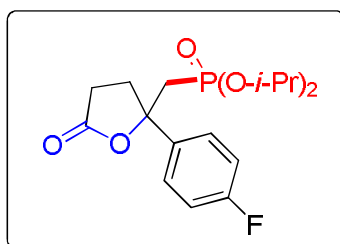

White solid.  $^1\text{H}$  NMR (400 MHz,  $\text{CDCl}_3$ )  $\delta$  (ppm) 7.44 – 7.38 (m, 2H), 7.08 – 7.02 (m, 2H), 4.73 – 4.65 (m, 1H), 4.61 – 4.52 (m, 1H), 3.06 – 2.99 (m, 1H), 2.75 – 2.67 (m, 1H), 2.64 – 2.57 (m, 1H), 2.48 – 2.40 (m, 3H), 1.30 (d,  $J = 6.2$  Hz, 6H), 1.21 (d,  $J = 6.2$  Hz, 3H), 1.17 (d,  $J = 6.2$  Hz, 3H).  $^{13}\text{C}$  NMR (100 MHz,  $\text{CDCl}_3$ )  $\delta$  (ppm) 175.8 (s), 162.5 (d,  $J = 251.3$  Hz), 139.38 (d,  $J = 3.1$  Hz), 126.9 (d,  $J = 8.2$  Hz), 115.6 (d,  $J = 21.7$  Hz), 85.6 (s), 71.2 (d,  $J = 6.6$  Hz), 70.8 (d,  $J = 6.8$  Hz), 40.9 (d,  $J = 140.6$  Hz), 33.94 (d,  $J = 2.5$  Hz), 28.8 (s), 24.25 (d,  $J = 3.7$  Hz), 24.0 (m).  $^{31}\text{P}$  NMR (162 MHz,  $\text{CDCl}_3$ )  $\delta$  (ppm) 20.9. HRMS-ESI:  $m/z$  381.1233 ( $[\text{M}+\text{Na}]^+$ ),  $\text{C}_{17}\text{H}_{24}\text{FNaO}_5\text{P}^+$  calcd. 381.1238).

##### Diisopropyl ((2-(4-methoxyphenyl)-5-oxotetrahydrofuran-2-yl)methyl)phosphonate (3c)

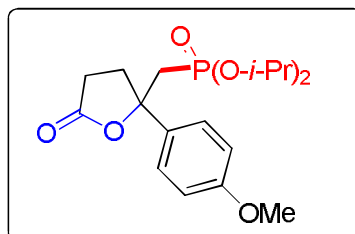

Colourless oil.  $^1\text{H}$  NMR (400 MHz,  $\text{CDCl}_3$ )  $\delta$  (ppm) 7.31 – 7.27 (m, 2H), 6.86 – 6.82 (m, 2H), 4.69 – 4.60 (m, 1H), 4.56 – 4.48 (m, 1H), 3.75 (s, 3H), 2.99 – 2.91 (m, 1H), 2.68 – 2.53 (m, 2H), 2.46 – 2.33 (m, 3H), 1.26 – 1.25 (m, 6H), 1.17 (d,  $J = 6.1$  Hz, 3H), 1.12 (d,  $J = 6.1$  Hz, 3H).  $^{13}\text{C}$  NMR (100 MHz,  $\text{CDCl}_3$ )  $\delta$  (ppm) 176.2 (s), 159.4 (s), 135.5 (d,  $J = 8.9$  Hz), 126.1 (s), 113.9 (s),

85.8 (s), 71.1 (d,  $J = 6.7$  Hz), 70.7 (d,  $J = 6.8$  Hz), 55.4 (s), 40.8 (d,  $J = 140.6$  Hz), 33.7 (d,  $J = 2.3$  Hz), 28.9 (s), 24.15 (d,  $J = 3.6$  Hz), 23.9 (m).  $^{31}\text{P}$  NMR (162 MHz,  $\text{CDCl}_3$ )  $\delta$  (ppm) 20.5. HRMS-ESI:  $m/z$  393.1439 ( $[\text{M}+\text{Na}]^+$ ,  $\text{C}_{18}\text{H}_{27}\text{NaO}_6\text{P}^+$  calcd. 393.1437).

### Diethyl ((5-oxo-2-phenyltetrahydrofuran-2-yl)methyl)phosphonate (3d)

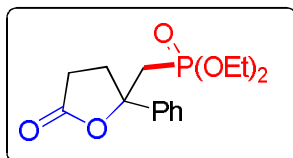

Colourless oil.  $^1\text{H}$  NMR (400 MHz,  $\text{CDCl}_3$ )  $\delta$  (ppm) 7.44 – 7.36 (m, 4H), 7.33 – 7.29 (m, 1H), 4.13 – 4.05 (m, 2H), 3.97 – 3.87 (m, 2H), 3.08 – 3.01 (m, 1H), 2.76 – 2.68 (m, 1H), 2.65 – 2.60 (m, 1H), 2.55 (d,  $J = 18.6$  Hz, 2H), 2.50 – 2.41 (m, 1H), 1.31 (t,  $J = 7.1$  Hz, 3H), 1.18 (t,  $J = 7.1$  Hz, 3H).  $^{13}\text{C}$  NMR (100 MHz,  $\text{CDCl}_3$ )  $\delta$  (ppm) 176.0 (s), 143.45 (d,  $J = 9.2$  Hz), 128.7 (s), 128.2 (s), 124.7 (s), 85.6 (d,  $J = 2.2$  Hz), 62.3 (d,  $J = 6.5$  Hz), 61.85 (d,  $J = 6.6$  Hz), 39.2 (d,  $J = 139.3$  Hz), 33.87 (d,  $J = 2.9$  Hz), 28.7 (s), 16.4 (d,  $J = 6.2$  Hz), 16.26 (d,  $J = 6.3$  Hz).  $^{31}\text{P}$  NMR (162 MHz,  $\text{CDCl}_3$ )  $\delta$  (ppm) 23.2. HRMS-ESI:  $m/z$  335.1021 ( $[\text{M}+\text{Na}]^+$ ,  $\text{C}_{15}\text{H}_{21}\text{NaO}_5\text{P}^+$  calcd. 335.1019).

### Dimethyl ((5-oxo-2-phenyltetrahydrofuran-2-yl)methyl)phosphonate (3e)

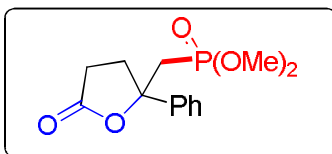

Colourless oil.  $^1\text{H}$  NMR (400 MHz,  $\text{CDCl}_3$ )  $\delta$  (ppm) 7.40 – 7.33 (m, 4H), 7.30 – 7.26 (m, 1H), 3.71 (d,  $J = 11.2$  Hz, 3H), 3.51 (d,  $J = 11.1$  Hz, 3H), 3.03 – 2.96 (m, 1H), 2.72 – 2.64 (m, 1H), 2.61 – 2.56 (m, 1H), 2.55 – 2.50 (m, 1H), 2.46 – 2.38 (m, 1H).  $^{13}\text{C}$  NMR (100 MHz,  $\text{CDCl}_3$ )  $\delta$  (ppm) 175.9 (s), 143.3 (d,  $J = 9.5$  Hz), 128.8 (s), 128.2 (s), 124.6 (s), 85.38 (d,  $J = 2.2$  Hz), 52.8 (d,  $J = 6.5$  Hz), 52.3 (d,  $J = 6.6$  Hz), 38.4 (d,  $J = 139.2$  Hz), 33.9 (d,  $J = 3.1$  Hz), 28.6 (s).  $^{31}\text{P}$  NMR (162 MHz,  $\text{CDCl}_3$ )  $\delta$  (ppm) 25.9. HRMS-ESI:  $m/z$  307.0710 ( $[\text{M}+\text{Na}]^+$ ,  $\text{C}_{13}\text{H}_{17}\text{NaO}_5\text{P}^+$  calcd. 307.0706).

### Dibenzyl ((5-oxo-2-phenyltetrahydrofuran-2-yl)methyl)phosphonate (3f)

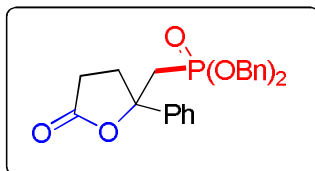

Colourless oil.  $^1\text{H}$  NMR (400 MHz,  $\text{CDCl}_3$ )  $\delta$  (ppm) 7.39 – 7.27 (m, 13H), 7.19 – 7.17 (m, 2H), 4.98 – 4.95 (m, 2H), 4.78 – 4.76 (m, 2H), 3.03 – 2.94 (m, 1H), 2.67 – 2.55 (m, 4H), 2.45 – 2.38 (m, 1H).  $^{13}\text{C}$  NMR (100 MHz,  $\text{CDCl}_3$ )  $\delta$  (ppm) 175.9 (s), 143.2 (d,  $J = 9.1$  Hz), 136.1 (d,  $J = 6.0$  Hz), 135.96 (d,  $J = 6.4$  Hz), 128.8 (s), 128.7 (s), 128.65 (s), 128.63 (s), 128.57 (s), 128.4 (s), 128.25 (s), 128.19 (s), 124.7 (s), 85.5 (d,  $J = 2.2$  Hz), 67.9 (d,  $J = 6.4$  Hz), 67.3 (d,  $J = 6.7$  Hz), 39.7 (d,  $J = 138.9$  Hz), 34.0 (d,  $J = 3.0$  Hz), 28.6 (s).  $^{31}\text{P}$  NMR (162 MHz,  $\text{CDCl}_3$ )  $\delta$  (ppm) 25.9. HRMS-ESI:  $m/z$  459.1337 ( $[\text{M}+\text{Na}]^+$ ,  $\text{C}_{25}\text{H}_{25}\text{NaO}_5\text{P}^+$  calcd. 459.1332).

### Ethyl ((5-oxo-2-phenyltetrahydrofuran-2-yl)methyl)(phenyl)phosphinate (3g)

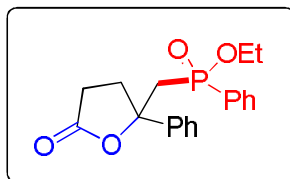

White solid.  $^1\text{H}$  NMR (400 MHz,  $\text{CDCl}_3$ )  $\delta$  (ppm) 7.59 – 7.14 (m, 10H), 3.95 – 3.66 (m, 2H), 3.27 – 3.17 (m, 1H), 2.88 – 2.54 (m, 5H), 1.28 (t,  $J = 7.0$  Hz, 3H).  $^{13}\text{C}$  NMR (100 MHz,  $\text{CDCl}_3$ )  $\delta$  (ppm) 175.8 (s), 143.9 (d,  $J = 8.0$  Hz), 132.6 (d,  $J = 2.9$  Hz), 131.65 (d,  $J = 10.2$  Hz), 128.9 (s), 128.6 (s), 128.6 (s), 128.0 (s), 124.7 (s), 86.2 (s), 61.1 (d,  $J = 6.1$  Hz), 60.6 (d,  $J = 6.2$  Hz), 43.4 (d,  $J = 35.0$  Hz), 33.9 (d,  $J = 2.0$  Hz), 28.6 (s), 16.4 (d,  $J = 6.6$  Hz), 16.3 (d,  $J = 6.7$  Hz).  $^{31}\text{P}$  NMR (162 MHz,  $\text{CDCl}_3$ )  $\delta$  (ppm) 37.7. HRMS-ESI:  $m/z$  345.1252 ( $[\text{M}+\text{H}]^+$ ,  $\text{C}_{19}\text{H}_{22}\text{O}_4\text{P}^+$  calcd. 345.1250).

### 5-((Diphenylphosphoryl)methyl)-5-phenyldihydrofuran-2(3H)-one (3h)

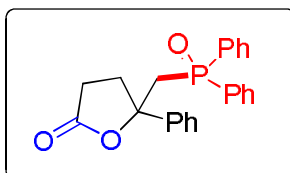

White solid.  $^1\text{H}$  NMR (400 MHz,  $\text{CDCl}_3$ )  $\delta$  (ppm) 7.78 – 7.73 (m, 2H), 7.58 – 7.53 (m, 2H), 7.50 – 7.42 (m, 3H), 7.40 – 7.34 (m, 3H), 7.33 – 7.28 (m, 2H), 7.21 – 7.13 (m, 3H), 3.43 – 3.35 (m, 1H), 3.14 – 3.02 (m, 2H), 2.77 – 2.67 (m, 2H), 2.42 – 2.33 (m, 1H).  $^{13}\text{C}$  NMR (100 MHz,  $\text{CDCl}_3$ )  $\delta$  (ppm) 175.6 (s), 143.0 (d,  $J = 5.9$  Hz), 133.5 (d,  $J = 45.0$  Hz), 132.5 (d,  $J = 44.7$  Hz), 131.75 (d,  $J = 2.6$  Hz), 131.4 (d,  $J = 2.6$  Hz), 130.45 (d,  $J = 9.6$  Hz), 130.2 (d,  $J = 9.5$  Hz), 128.6 (d,  $J = 12.1$  Hz), 128.43 (s), 128.4 (d,  $J = 11.7$  Hz), 128.0 (s), 124.7 (s), 86.73 (d,  $J = 2.3$  Hz), 42.2 (d,  $J = 67.3$  Hz), 33.5 (s), 28.5 (s).  $^{31}\text{P}$  NMR (162 MHz,  $\text{CDCl}_3$ )  $\delta$  (ppm) 25.9. HRMS-ESI:  $m/z$  399.1123 ( $[\text{M}+\text{Na}]^+$ ,  $\text{C}_{23}\text{H}_{21}\text{NaO}_3\text{P}^+$  calcd. 399.1121).

### Diisopropyl ((5-oxotetrahydrofuran-2-yl)methyl)phosphonate (3i)

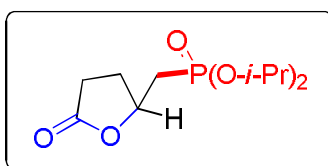

Colourless oil. 4.79 – 4.64 (m, 3H), 2.58 – 2.41 (m, 3H), 2.36 – 2.27 (m, 1H), 2.13 – 1.96 (m, 2H), 1.30 – 1.29 (m, 12H).  $^{13}\text{C}$  NMR (100 MHz,  $\text{CDCl}_3$ )  $\delta$  (ppm) 176.4 (s), 75.9 (s), 71.08 (d,  $J = 6.8$  Hz), 70.9 (d,  $J = 6.6$  Hz), 33.7 (d,  $J = 139.2$  Hz), 29.0 (d,  $J = 4.7$  Hz), 28.7 (s), 24.1 (m).  $^{31}\text{P}$  NMR (162 MHz,  $\text{CDCl}_3$ )  $\delta$  (ppm) 22.7. HRMS-ESI:  $m/z$  287.1013 ( $[\text{M}+\text{Na}]^+$ ,  $\text{C}_{11}\text{H}_{21}\text{NaO}_5\text{P}^+$  calcd. 287.1019).

### Diisopropyl ((2S,3R)-5-oxo-2-phenyltetrahydrofuran-3-yl)phosphonate (5a)

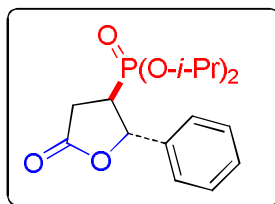

Colourless oil.  $^1\text{H}$  NMR (400 MHz,  $\text{CDCl}_3$ )  $\delta$  (ppm) 7.37 – 7.28 (m, 5H), 5.60 (dd,  $J = 13.5$  Hz,  $J = 7.0$  Hz, 1H), 4.72 – 4.62 (m, 2H), 2.89 – 2.83 (m, 2H), 2.79 – 2.70 (m, 1H), 1.27 (d,  $J = 1.7$  Hz, 3H), 1.26 (d,  $J = 1.7$  Hz, 3H), 1.21 (d,  $J = 6.2$  Hz, 3H), 1.12 (d,  $J = 6.2$  Hz, 3H).  $^{13}\text{C}$  NMR (100 MHz,  $\text{CDCl}_3$ )  $\delta$  (ppm) 174.5 (d,  $J = 12.4$  Hz), 138.4 (d,  $J = 5.4$  Hz), 129.0 (s), 128.8 (s), 126.1 (s), 81.1 (s), 71.9 (d,  $J = 7.0$  Hz), 70.6 (d,  $J = 7.0$  Hz), 41.5 (d,  $J = 152.0$  Hz), 30.3 (d,  $J = 4.1$  Hz), 23.9 (m), 23.67 (d,  $J = 4.6$  Hz).  $^{31}\text{P}$  NMR (162 MHz,  $\text{CDCl}_3$ )  $\delta$  (ppm) 22.6. HRMS-ESI:  $m/z$  349.1178 ( $[\text{M}+\text{Na}]^+$ ,  $\text{C}_{16}\text{H}_{23}\text{NaO}_5\text{P}^+$  calcd. 349.1175).

#### Diisopropyl ((2S,3R)-5-oxo-2-(p-tolyl)tetrahydrofuran-3-yl)phosphonate (5b)

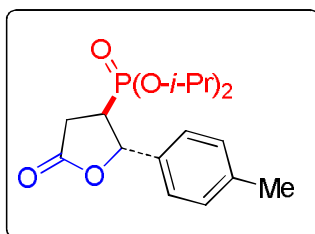

Colourless oil.  $^1\text{H}$  NMR (400 MHz,  $\text{CDCl}_3$ )  $\delta$  (ppm) 7.22 (d,  $J = 8.1$  Hz, 2H), 7.16 (d,  $J = 8.1$  Hz, 2H), 5.58 (dd,  $J = 13.5$  Hz,  $J = 7.0$  Hz, 1H), 4.73 – 4.63 (m, 2H), 2.89 – 2.83 (m, 2H), 2.79 – 2.69 (m, 1H), 2.33 (s, 3H), 1.28 (d,  $J = 2.5$  Hz, 3H), 1.27 (d,  $J = 2.5$  Hz, 3H), 1.21 (d,  $J = 6.2$  Hz, 3H), 1.15 (d,  $J = 6.2$  Hz, 3H).  $^{13}\text{C}$  NMR (100 MHz,  $\text{CDCl}_3$ )  $\delta$  (ppm) 174.6 (d,  $J = 12.7$  Hz), 138.9 (s), 135.5 (d,  $J = 5.3$  Hz), 129.4 (s), 126.1 (s), 81.1 (s), 71.8 (d,  $J = 6.8$  Hz), 71.5 (d,  $J = 6.8$  Hz), 41.5 (d,  $J = 152.5$  Hz), 30.4 (d,  $J = 4.1$  Hz), 23.9 (m), 23.7 (d,  $J = 4.8$  Hz), 21.1 (s).  $^{31}\text{P}$  NMR (162 MHz,  $\text{CDCl}_3$ )  $\delta$  (ppm) 22.8. HRMS-ESI:  $m/z$  343.1512 ( $[\text{M}+\text{H}]^+$ ,  $\text{C}_{17}\text{H}_{26}\text{O}_5\text{P}^+$  calcd. 343.1512).

#### Diisopropyl ((2S,3R)-5-oxo-2-(m-tolyl)tetrahydrofuran-3-yl)phosphonate (5c)

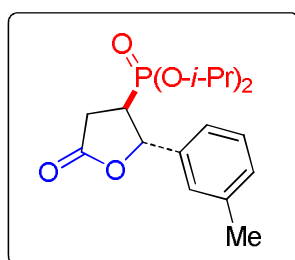

Colourless oil.  $^1\text{H}$  NMR (400 MHz,  $\text{CDCl}_3$ )  $\delta$  (ppm) 7.30 – 7.25 (m, 1H), 7.15 (d,  $J = 7.7$  Hz, 3H), 5.61 (dd,  $J = 13.8$  Hz,  $J = 6.8$  Hz, 1H), 4.77 – 4.67 (m, 2H), 2.92 – 2.86 (m, 2H), 2.82 – 2.73 (m, 1H), 2.36 (s, 3H), 1.31 (d,  $J = 2.0$  Hz, 3H), 1.30 (d,  $J = 2.0$  Hz, 3H), 1.24 (d,  $J = 6.2$  Hz, 3H), 1.18 (d,  $J = 6.2$  Hz, 3H).  $^{13}\text{C}$  NMR (100 MHz,  $\text{CDCl}_3$ )  $\delta$  (ppm) 174.6 (d,  $J = 11.9$  Hz), 138.6 (s), 138.46 (d,  $J = 5.5$  Hz), 129.7 (s), 128.7 (s), 126.7 (s), 123.2 (s), 81.1 (s), 71.93 (d,  $J = 7.0$  Hz), 71.65 (d,  $J = 7.1$  Hz), 41.5 (d,  $J = 152.0$  Hz), 30.25 (d,  $J = 4.0$  Hz), 24.0 (m), 23.7 (d,  $J = 4.7$  Hz), 21.4 (s).  $^{31}\text{P}$  NMR (162 MHz,  $\text{CDCl}_3$ )  $\delta$  (ppm) 23.0. HRMS-ESI:  $m/z$  343.1508 ( $[\text{M}+\text{H}]^+$ ,

$C_{17}H_{26}O_5P^+$  calcd. 343.1512).

**Diisopropyl ((2S,3R)-5-oxo-2-(*o*-tolyl)tetrahydrofuran-3-yl)phosphonate (5d)**

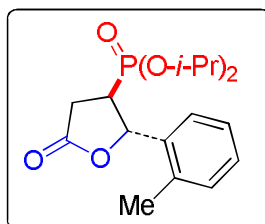

Colourless oil.  $^1H$  NMR (400 MHz,  $CDCl_3$ )  $\delta$  (ppm) 7.30 – 7.25 (m, 1H), 7.16 (d,  $J = 7.7$  Hz, 3H), 5.61 (dd,  $J = 13.8$  Hz,  $J = 6.9$  Hz, 1H), 4.77 – 4.67 (m, 2H), 2.92 – 2.86 (m, 2H), 2.82 – 2.72 (m, 1H), 2.36 (s, 3H), 1.31 (d,  $J = 2.4$  Hz, 3H), 1.30 (d,  $J = 2.4$  Hz, 3H), 1.24 (d,  $J = 6.2$  Hz, 3H), 1.18 (d,  $J = 6.2$  Hz, 3H).  $^{13}C$  NMR (100 MHz,  $CDCl_3$ )  $\delta$  (ppm) 174.7 (d,  $J = 12.1$  Hz), 138.6 (s), 138.5 (d,  $J = 5.5$  Hz), 129.7 (s), 128.8 (s), 126.7 (s), 123.2 (s), 81.1 (s), 71.9 (d,  $J = 7.0$  Hz), 71.6 (d,  $J = 7.0$  Hz), 41.5 (d,  $J = 152.1$  Hz), 30.3 (d,  $J = 4.1$  Hz), 24.0 (m), 23.75 (d,  $J = 4.8$  Hz), 21.5 (s).  $^{31}P$  NMR (162 MHz,  $CDCl_3$ )  $\delta$  (ppm) 22.9. HRMS-ESI:  $m/z$  343.1512 ( $[M+H]^+$ ,  $C_{17}H_{26}O_5P^+$  calcd. 343.1512).

**Diisopropyl ((2S,3R)-2-(4-(*tert*-butyl)phenyl)-5-oxotetrahydrofuran-3-yl)phosphonate (5e)**

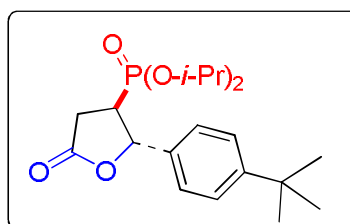

Colourless oil.  $^1H$  NMR (400 MHz,  $CDCl_3$ )  $\delta$  (ppm) 7.42 – 7.40 (m, 2H), 7.31 – 7.29 (m, 2H), 5.61 (dd,  $J = 13.4$  Hz,  $J = 7.1$  Hz, 1H), 4.75 – 4.65 (m, 2H), 2.92 – 2.86 (m, 2H), 2.84 – 2.76 (m, 1H), 1.32 – 1.29 (m, 15H), 1.22 (d,  $J = 6.2$  Hz, 3H), 1.14 (d,  $J = 6.2$  Hz, 3H).  $^{13}C$  NMR (100 MHz,  $CDCl_3$ )  $\delta$  (ppm) 174.7 (d,  $J = 12.5$  Hz), 152.3 (s), 138.35 (d,  $J = 5.1$  Hz), 126.0 (s), 125.8 (s), 81.1 (s), 71.9 (d,  $J = 6.7$  Hz), 71.7 (d,  $J = 7.1$  Hz), 41.6 (d,  $J = 152.1$  Hz), 34.7 (s), 31.4 (s), 30.5 (d,  $J = 4.1$  Hz), 24.0 (m), 23.7 (d,  $J = 4.8$  Hz).  $^{31}P$  NMR (162 MHz,  $CDCl_3$ )  $\delta$  (ppm) 22.6. HRMS-ESI:  $m/z$  405.1804 ( $[M+Na]^+$ ,  $C_{20}H_{31}NaO_5P^+$  calcd. 405.1801).

**Diisopropyl ((2S,3R)-2-(4-methoxyphenyl)-5-oxotetrahydrofuran-3-yl)phosphonate (5f)**

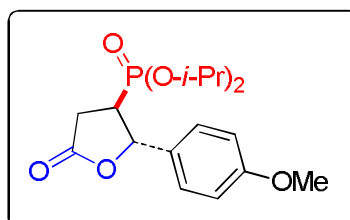

Colourless oil.  $^1H$  NMR (400 MHz,  $CDCl_3$ )  $\delta$  (ppm) 7.24 – 7.21 (m, 2H), 6.86 – 6.83 (m, 2H), 6.18 (dd,  $J = 8.6$  Hz,  $J = 6.4$  Hz, 1H), 4.71 – 4.30 (m, 3H), 3.76 (s, 3H), 2.91 – 2.57 (m, 2H), 1.28 (d,  $J = 6.2$  Hz, 6H), 1.19 (d,  $J = 6.3$  Hz, 3H), 1.14 (d,  $J = 6.2$  Hz, 3H).  $^{13}C$  NMR (100 MHz,  $CDCl_3$ )  $\delta$  (ppm) 170.5 (s), 159.4 (s), 130.9 (s), 128.0 (s), 113.7 (s), 81.1 (s), 70.8 (d,  $J = 6.9$  Hz),

70.6 (d,  $J = 7.1$  Hz), 55.2 (s), 43.7 (d,  $J = 140.3$  Hz), 23.8 (m), 20.6 (s).  $^{31}\text{P}$  NMR (162 MHz,  $\text{CDCl}_3$ )  $\delta$  (ppm) 22.6. HRMS-ESI:  $m/z$  379.1286 ( $[\text{M}+\text{Na}]^+$ ,  $\text{C}_{17}\text{H}_{25}\text{NaO}_6\text{P}^+$  calcd. 379.1281).

**Diisopropyl ((2S,3R)-5-oxo-2-(4-(trifluoromethyl)phenyl)tetrahydrofuran-3-yl)phosphonate (5g)**

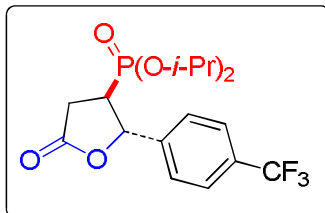

Colourless oil.  $^1\text{H}$  NMR (400 MHz,  $\text{CDCl}_3$ )  $\delta$  (ppm) 7.66 (d,  $J = 8.2$  Hz, 2H), 7.53 (d,  $J = 8.3$  Hz, 2H), 5.70 (dd,  $J = 13.6$  Hz,  $J = 7.1$  Hz, 1H), 4.83 – 4.71 (m, 2H), 2.95 – 2.87 (m, 2H), 2.81 – 2.71 (m, 1H), 1.33 (t,  $J = 6.0$  Hz, 6H), 1.28 (d,  $J = 6.2$  Hz, 3H), 1.23 (d,  $J = 6.2$  Hz, 3H).  $^{13}\text{C}$  NMR (100 MHz,  $\text{CDCl}_3$ )  $\delta$  (ppm) 174.2 (d,  $J = 12.1$  Hz), 142.7 (d,  $J = 4.8$  Hz), 131.4 (d,  $J = 33.0$  Hz), 130.5 (s), 126.6 (s), 125.9 (q,  $J = 3.8$  Hz), 80.1 (s), 72.4 (d,  $J = 7.0$  Hz), 72.2 (d,  $J = 6.9$  Hz), 41.7 (d,  $J = 153.2$  Hz), 30.2 (d,  $J = 4.0$  Hz), 24.1 (m), 23.9 (d,  $J = 4.5$  Hz).  $^{31}\text{P}$  NMR (162 MHz,  $\text{CDCl}_3$ )  $\delta$  (ppm) 21.9. HRMS-ESI:  $m/z$  417.1056 ( $[\text{M}+\text{Na}]^+$ ,  $\text{C}_{17}\text{H}_{22}\text{F}_3\text{NaO}_5\text{P}^+$  calcd. 417.1049).

**Diisopropyl ((2S,3R)-2-(4-bromophenyl)-5-oxotetrahydrofuran-3-yl)phosphonate (5h)**

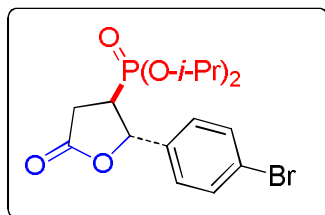

Colourless oil.  $^1\text{H}$  NMR (400 MHz,  $\text{CDCl}_3$ )  $\delta$  (ppm) 7.47 (d,  $J = 8.5$  Hz, 2H), 7.23 (d,  $J = 8.3$  Hz, 2H), 5.54 (dd,  $J = 13.3$  Hz,  $J = 7.4$  Hz, 1H), 4.74 – 4.62 (m, 2H), 2.87 – 2.81 (m, 2H), 2.74 – 2.63 (m, 1H), 1.27 (t,  $J = 5.5$  Hz, 6H), 1.21 (d,  $J = 6.2$  Hz, 3H), 1.16 (d,  $J = 6.2$  Hz, 3H).  $^{13}\text{C}$  NMR (100 MHz,  $\text{CDCl}_3$ )  $\delta$  (ppm) 174.2 (d,  $J = 13.2$  Hz), 137.5 (d,  $J = 4.9$  Hz), 131.9 (s), 127.9 (s), 123.0 (s), 81.3 (s), 72.0 (d,  $J = 6.9$  Hz), 71.7 (d,  $J = 7.1$  Hz), 41.5 (d,  $J = 152.5$  Hz), 30.27 (d,  $J = 4.0$  Hz), 24.0 (m), 23.76 (d,  $J = 4.6$  Hz).  $^{31}\text{P}$  NMR (162 MHz,  $\text{CDCl}_3$ )  $\delta$  (ppm) 22.1. HRMS-ESI:  $m/z$  427.0279 ( $[\text{M}+\text{Na}]^+$ ,  $\text{C}_{16}\text{H}_{22}\text{BrNaO}_5\text{P}^+$  calcd. 427.0280).

**Diisopropyl ((2S,3R)-2-(4-chlorophenyl)-5-oxotetrahydrofuran-3-yl)phosphonate (5i)**

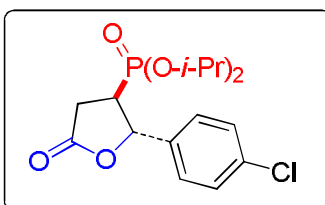

Colourless oil.  $^1\text{H}$  NMR (400 MHz,  $\text{CDCl}_3$ )  $\delta$  (ppm) 7.38 – 7.31 (m, 4H), 5.60 (dd,  $J = 13.2$  Hz,  $J = 7.4$  Hz, 1H), 4.78 – 4.67 (m, 2H), 2.92 – 2.86 (m, 2H), 2.77 – 2.67 (m, 1H), 1.31 (t,  $J = 5.5$  Hz, 6H), 1.26 (d,  $J = 6.2$  Hz, 3H), 1.21 (d,  $J = 6.2$  Hz, 3H).  $^{13}\text{C}$  NMR (100 MHz,  $\text{CDCl}_3$ )  $\delta$  (ppm)



174.2 (d,  $J = 12.8$  Hz), 137.05 (d,  $J = 4.5$  Hz), 134.9 (s), 129.0 (s), 127.6 (s), 81.4 (s), 72.0 (d,  $J = 6.9$  Hz), 71.7 (d,  $J = 7.1$  Hz), 41.6 (d,  $J = 152.3$  Hz), 30.36 (d,  $J = 4.1$  Hz), 24.0 (m), 23.8 (d,  $J = 4.6$  Hz).  $^{31}\text{P}$  NMR (162 MHz,  $\text{CDCl}_3$ )  $\delta$  (ppm) 22.0. HRMS-ESI:  $m/z$  383.0789 ( $[\text{M}+\text{Na}]^+$ ,  $\text{C}_{16}\text{H}_{22}\text{ClNaO}_5\text{P}^+$  calcd. 383.0786).

**Diisopropyl ((2S,3R)-2-(naphthalen-2-yl)-5-oxotetrahydrofuran-3-yl)phosphonate (5j)**

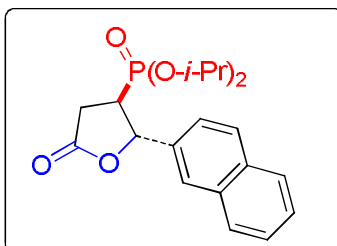

Colourless oil.  $^1\text{H}$  NMR (400 MHz,  $\text{CDCl}_3$ )  $\delta$  (ppm) 7.91 – 7.89 (m, 1H), 7.87 – 7.84 (m, 2H), 7.54 – 7.51 (m, 2H), 7.49 – 7.46 (m, 2H), 5.84 (dd,  $J = 14.1$  Hz,  $J = 6.6$  Hz, 1H), 4.81 – 4.70 (m, 2H), 2.98 – 2.82 (m, 3H), 1.32 (dd,  $J = 6.1$  Hz,  $J = 4.3$  Hz, 6H), 1.25 (d,  $J = 6.2$  Hz, 3H), 1.19 (d,  $J = 6.2$  Hz, 3H).  $^{13}\text{C}$  NMR (100 MHz,  $\text{CDCl}_3$ )  $\delta$  (ppm) 174.7 (d,  $J = 12.0$  Hz), 136.0 (d,  $J = 5.5$  Hz), 133.6 (s), 133.2 (s), 132.3 (d,  $J = 10.1$  Hz), 129.1 (s), 128.3 (s), 127.9 (s), 126.9 (s), 125.6 (s), 123.2 (s), 81.2 (s), 72.1 (d,  $J = 7.1$  Hz), 71.8 (d,  $J = 7.3$  Hz), 41.6 (d,  $J = 151.8$  Hz), 30.3 (d,  $J = 3.9$  Hz), 24.0 (m).  $^{31}\text{P}$  NMR (162 MHz,  $\text{CDCl}_3$ )  $\delta$  (ppm) 22.4. HRMS-ESI:  $m/z$  399.1335 ( $[\text{M}+\text{Na}]^+$ ,  $\text{C}_{20}\text{H}_{25}\text{NaO}_5\text{P}^+$  calcd. 399.1332).

**Diisopropyl ((2R,3R)-5-oxo-2-(thiophen-2-yl)tetrahydrofuran-3-yl)phosphonate (5k)**

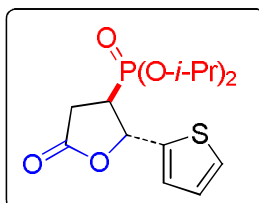

Yellow oil.  $^1\text{H}$  NMR (400 MHz,  $\text{CDCl}_3$ )  $\delta$  (ppm) 7.31 – 7.30 (m, 1H), 7.11 – 7.10 (m, 1H), 6.96 – 6.94 (m, 1H), 5.79 (dd,  $J = 12.7$  Hz,  $J = 6.6$  Hz, 1H), 4.70 – 4.61 (m, 2H), 2.92 – 2.82 (m, 3H), 1.26 – 1.24 (m, 6H), 1.17 – 1.15 (m, 6H).  $^{13}\text{C}$  NMR (100 MHz,  $\text{CDCl}_3$ )  $\delta$  (ppm) 173.6 (d,  $J = 12.8$  Hz), 140.9 (d,  $J = 6.0$  Hz), 127.0 (s), 126.7 (s), 125.8 (s), 77.1 (s), 71.8 (d,  $J = 6.9$  Hz), 71.7 (d,  $J = 7.1$  Hz), 67.7 (s), 41.6 (d,  $J = 153.0$  Hz), 23.8 (m).  $^{31}\text{P}$  NMR (162 MHz,  $\text{CDCl}_3$ )  $\delta$  (ppm) 21.8. HRMS-ESI:  $m/z$  355.0735 ( $[\text{M}+\text{Na}]^+$ ,  $\text{C}_{14}\text{H}_{21}\text{NaO}_5\text{PS}^+$  calcd. 355.0740).

**Diisopropyl ((2R,3R)-2-methyl-5-oxo-2-phenyltetrahydrofuran-3-yl)phosphonate (5l)**

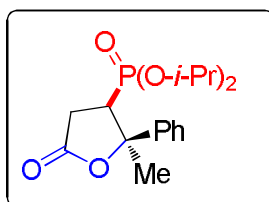

Colourless oil.  $^1\text{H}$  NMR (400 MHz,  $\text{CDCl}_3$ )  $\delta$  (ppm) 7.53 – 7.50 (m, 2H), 7.39 – 7.35 (m, 2H),

7.33 – 7.28 (m, 1H), 4.83 – 4.70 (m, 2H), 3.03 – 2.88 (m, 2H), 2.82 – 2.72 (m, 1H), 1.92 (s, 3H), 1.36 – 1.29 (m, 12H).  $^{13}\text{C}$  NMR (100 MHz,  $\text{CDCl}_3$ )  $\delta$  (ppm) 174.1 (d,  $J = 12.5$  Hz), 144.4 (d,  $J = 5.9$  Hz), 128.6 (s), 128.1 (s), 124.7 (s), 87.2 (s), 71.7 (d,  $J = 7.2$  Hz), 71.6 (d,  $J = 6.9$  Hz), 45.1 (d,  $J = 149.6$  Hz), 31.54 (d,  $J = 3.9$  Hz), 25.4 (d,  $J = 3.1$  Hz), 24.0 (m).  $^{31}\text{P}$  NMR (162 MHz,  $\text{CDCl}_3$ )  $\delta$  (ppm) 21.6. HRMS-ESI:  $m/z$  343.1516 ( $[\text{M}+\text{H}]^+$ ,  $\text{C}_{17}\text{H}_{26}\text{O}_5\text{P}^+$  calcd. 343.1512).

**(R)-Diisopropyl (2-oxo-1-oxaspiro[4.5]decan-4-yl)phosphonate (5m)**

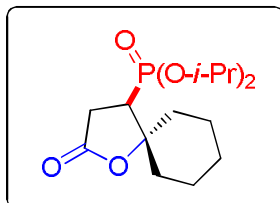

White solid.  $^1\text{H}$  NMR (400 MHz,  $\text{CDCl}_3$ )  $\delta$  (ppm) 4.77 – 4.69 (m, 2H), 2.95 – 2.84 (m, 1H), 2.71 – 2.64 (m, 1H), 2.46 – 2.37 (m, 1H), 1.99 – 1.88 (m, 2H), 1.81 – 1.54 (m, 8H), 1.34 – 1.30 (m, 12H).  $^{13}\text{C}$  NMR (100 MHz,  $\text{CDCl}_3$ )  $\delta$  (ppm) 174.2 (d,  $J = 18.9$  Hz), 87.03 (d,  $J = 18.9$  Hz), 71.36 (d,  $J = 5.8$  Hz), 71.28 (d,  $J = 5.2$  Hz), 44.5 (d,  $J = 153.5$  Hz), 37.6 (s), 33.15 (d,  $J = 2.7$  Hz), 30.96 (d,  $J = 3.3$  Hz), 25.0 (s), 24.2 (m), 22.8 (s), 21.7 (s).  $^{31}\text{P}$  NMR (162 MHz,  $\text{CDCl}_3$ )  $\delta$  (ppm) 21.7. HRMS-ESI:  $m/z$  319.1700 ( $[\text{M}+\text{H}]^+$ ,  $\text{C}_{15}\text{H}_{28}\text{O}_5\text{P}^+$  calcd. 319.1699).

**(4R,5S)-5-Cyclohexyl-4-(diphenylphosphoryl)dihydrofuran-2(3H)-one (5n)**

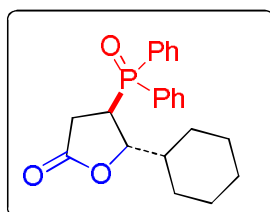

White solid.  $^1\text{H}$  NMR (400 MHz,  $\text{CDCl}_3$ )  $\delta$  (ppm) 7.84 – 7.74 (m, 4H), 7.57 – 7.46 (m, 6H), 4.64 (dd,  $J = 13.9$  Hz,  $J = 6.0$  Hz, 1H), 3.26 – 3.19 (m, 1H), 2.87 – 2.64 (m, 2H), 1.66 – 1.52 (m, 4H), 1.47 – 1.42 (m, 1H), 1.05 – 0.94 (m, 6H).  $^{13}\text{C}$  NMR (100 MHz,  $\text{CDCl}_3$ )  $\delta$  (ppm) 174.36 (d,  $J = 7.7$  Hz), 132.7 (s), 131.1 (d,  $J = 2.7$  Hz), 131.0 (d,  $J = 2.3$  Hz), 130.0 (d,  $J = 6.3$  Hz), 129.2 (s), 129.1 (s), 129.0 (s), 82.8 (s), 41.94 (d,  $J = 4.5$  Hz), 36.2 (d,  $J = 73.2$  Hz), 29.77 (d,  $J = 2.1$  Hz), 29.6 (s), 26.0 (d,  $J = 4.5$  Hz), 25.65 (d,  $J = 3.5$  Hz).  $^{31}\text{P}$  NMR (162 MHz,  $\text{CDCl}_3$ )  $\delta$  (ppm) 31.0. HRMS-ESI:  $m/z$  391.1435 ( $[\text{M}+\text{Na}]^+$ ,  $\text{C}_{22}\text{H}_{25}\text{NaO}_3\text{P}^+$  calcd. 391.1434).

**(4R,5S)-5-(4-(Tert-butyl) phenyl)-4-(diphenylphosphoryl)dihydrofuran-2(3H)-one (5o)**

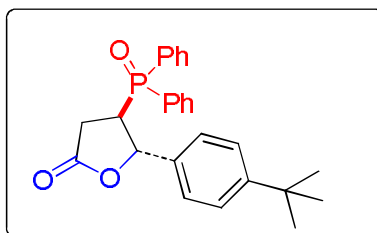

White solid.  $^1\text{H}$  NMR (400 MHz,  $\text{CDCl}_3$ )  $\delta$  (ppm) 7.78 – 7.73 (m, 2H), 7.53 – 7.41 (m, 5H), 7.35 – 7.31 (m, 1H), 7.20 – 7.16 (m, 2H), 7.08 (d,  $J = 8.4$  Hz, 2H), 6.90 (d,  $J = 8.3$  Hz, 2H), 5.69 (t,  $J =$

9.2 Hz, 1H), 3.54 (q,  $J = 9.4$  Hz, 1H), 3.21 – 3.09 (m, 1H), 2.79 – 2.71 (m, 1H), 1.23 (s, 9H).  $^{13}\text{C}$  NMR (100 MHz,  $\text{CDCl}_3$ )  $\delta$  (ppm) 174.1 (d,  $J = 11.8$  Hz), 151.8 (s), 134.6 (s), 132.38 (d,  $J = 2.4$  Hz), 131.9 (d,  $J = 2.5$  Hz), 130.9 (d,  $J = 9.4$  Hz), 130.4 (d,  $J = 9.2$  Hz), 129.0 (d,  $J = 11.7$  Hz), 128.4 (d,  $J = 11.9$  Hz), 126.2 (s), 125.4 (s), 80.5 (s), 43.3 (d,  $J = 73.6$  Hz), 34.4 (s), 31.2 (s), 30.1 (s).  $^{31}\text{P}$  NMR (162 MHz,  $\text{CDCl}_3$ )  $\delta$  (ppm) 27.6. HRMS-ESI:  $m/z$  441.1592 ( $[\text{M}+\text{Na}]^+$ ,  $\text{C}_{26}\text{H}_{27}\text{NaO}_3\text{P}^+$  calcd. 441.1590).

**(4R,5S)-5-(4-Bromophenyl)-4-(diphenylphosphoryl)dihydrofuran-2(3H)-one (5p)**

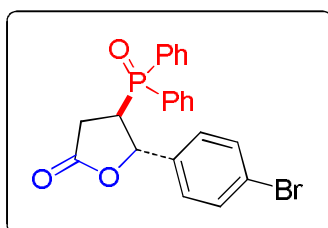

White solid.  $^1\text{H}$  NMR (400 MHz,  $\text{CDCl}_3$ )  $\delta$  (ppm) 7.76 – 7.71 (m, 2H), 7.56 – 7.43 (m, 6H), 7.30 – 7.26 (m, 2H), 7.21 (d,  $J = 8.4$  Hz, 2H), 6.82 (d,  $J = 8.4$  Hz, 2H), 5.67 (t,  $J = 9.4$  Hz, 1H), 3.37 (q,  $J = 9.5$  Hz, 1H), 3.21 – 3.10 (m, 1H), 2.76 – 2.68 (m, 1H).  $^{13}\text{C}$  NMR (100 MHz,  $\text{CDCl}_3$ )  $\delta$  (ppm) 173.8 (s), 137.0 (s), 132.7 (s), 132.4 (s), 131.7 (s), 131.0 (d,  $J = 8.9$  Hz), 130.6 (d,  $J = 9.0$  Hz), 129.2 (d,  $J = 11.7$  Hz), 128.8 (d,  $J = 12.0$  Hz), 128.1 (s), 123.0 (s), 79.9 (s), 43.7 (d,  $J = 73.0$  Hz), 30.2 (s).  $^{31}\text{P}$  NMR (162 MHz,  $\text{CDCl}_3$ )  $\delta$  (ppm) 27.4. HRMS-ESI:  $m/z$  463.0068 ( $[\text{M}+\text{Na}]^+$ ,  $\text{C}_{22}\text{H}_{18}\text{BrNaO}_3\text{P}^+$  calcd. 463.0069).

**(5R,6S)-5-(Diphenylphosphoryl)-6-phenyltetrahydro-2H-pyran-2-one (5q)**

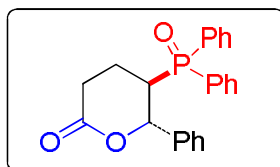

White solid.  $^1\text{H}$  NMR (400 MHz,  $\text{C}_2\text{D}_6\text{OS}$ )  $\delta$  (ppm) 7.92 – 7.87 (m, 2H), 7.54 – 7.48 (m, 5H), 7.29 – 7.24 (m, 1H), 7.20 – 7.14 (m, 4H), 7.04 – 7.01 (m, 3H), 5.63 (dd,  $J = 9.5$  Hz,  $J = 6.2$  Hz, 1H), 3.74 – 3.67 (m, 1H), 2.84 – 2.76 (m, 1H), 2.60 – 2.50 (m, 1H), 2.10 – 1.98 (m, 1H), 1.92 – 1.79 (m, 1H).  $^{13}\text{C}$  NMR (100 MHz,  $\text{C}_2\text{D}_6\text{OS}$ )  $\delta$  (ppm) 170.5 (s), 137.4 (s), 133.1 (d,  $J = 67.6$  Hz), 132.1 (d,  $J = 67.6$  Hz), 131.5 (d,  $J = 2.2$  Hz), 130.7 (d,  $J = 2.8$  Hz), 130.2 (d,  $J = 8.9$  Hz), 130.0 (d,  $J = 9.1$  Hz), 128.7 (d,  $J = 11.4$  Hz), 128.3 (s), 127.8 (d,  $J = 11.7$  Hz), 127.7 (s), 127.6 (s), 80.17 (d,  $J = 3.5$  Hz), 36.5 (d,  $J = 69.7$  Hz), 28.4 (d,  $J = 8.3$  Hz), 19.7 (s).  $^{31}\text{P}$  NMR (162 MHz,  $\text{C}_2\text{D}_6\text{OS}$ )  $\delta$  (ppm) 31.0. HRMS-ESI:  $m/z$  399.1126 ( $[\text{M}+\text{Na}]^+$ ,  $\text{C}_{23}\text{H}_{21}\text{NaO}_3\text{P}^+$  calcd. 399.1121).

**(5R,6S)-5-(Diphenylphosphoryl)-3,3-dimethyl-6-phenyltetrahydro-2H-pyran-2-one (5r)**

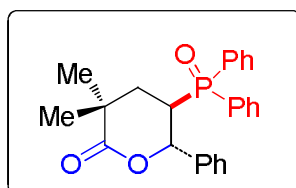

White solid.  $^1\text{H}$  NMR (400 MHz,  $\text{CDCl}_3$ )  $\delta$  (ppm) 7.74 – 7.69 (m, 2H), 7.49 – 7.40 (m, 3H), 7.36

– 7.31 (m, 2H), 7.17 – 7.12 (m, 3H), 7.05 – 7.01 (m, 2H), 6.96 – 6.89 (m, 3H), 5.78 (dd,  $J = 11.0$  Hz,  $J = 5.5$  Hz, 1H), 3.22 – 3.14 (m, 1H), 2.39 – 2.31 (m, 1H), 1.62 – 1.56 (m, 1H), 1.39 (s), 1.32 (s).  $^{13}\text{C}$  NMR (100 MHz,  $\text{CDCl}_3$ )  $\delta$  (ppm) 175.7 (s), 137.5 (s), 132.6 (s), 131.96 (d,  $J = 2.5$  Hz), 131.6 (s), 131.0 (d,  $J = 3.0$  Hz), 130.3 (d,  $J = 8.8$  Hz), 130.2 (d,  $J = 9.0$  Hz), 129.05 (d,  $J = 11.6$  Hz), 128.9 (s), 128.2 (s), 128.1 (d,  $J = 12.1$  Hz), 127.7 (s), 83.12 (d,  $J = 4.0$  Hz), 38.2 (d,  $J = 11.6$  Hz), 37.6 (d,  $J = 150.1$  Hz), 35.7 (s), 27.5 (s), 27.4 (s).  $^{31}\text{P}$  NMR (162 MHz,  $\text{CDCl}_3$ )  $\delta$  (ppm) 29.1. HRMS-ESI:  $m/z$  427.1432 ( $[\text{M}+\text{Na}]^+$ ,  $\text{C}_{25}\text{H}_{25}\text{NaO}_3\text{P}^+$  calcd. 427.1434).

**(3S,4R)-4-(Diphenylphosphoryl)-3-phenyl-2-oxaspiro[5.5]undecan-1-one (5s)**

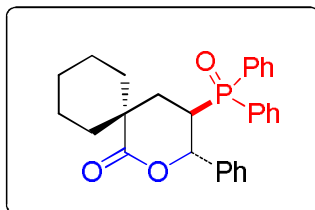

White solid.  $^1\text{H}$  NMR (400 MHz,  $\text{CDCl}_3$ )  $\delta$  (ppm) 7.76 (t,  $J = 7.5$  Hz, 2H), 7.52 – 7.45 (m, 3H), 7.35 (t,  $J = 8.2$  Hz, 2H), 7.19 – 7.12 (m, 3H), 7.07 – 7.04 (m, 2H), 6.97 – 6.92 (m, 3H), 5.73 (dd,  $J = 10.2$  Hz,  $J = 4.6$  Hz, 1H), 3.14 – 3.02 (m, 1H), 2.17 – 2.07 (m, 2H), 1.98 – 1.90 (m, 2H), 1.82 – 1.75 (m, 1H), 1.67 – 1.52 (m, 3H), 1.48 – 1.43 (m, 1H), 1.38 – 1.29 (m, 1H), 1.20 – 1.02 (m, 2H).  $^{13}\text{C}$  NMR (100 MHz,  $\text{CDCl}_3$ )  $\delta$  (ppm) 175.7 (s), 137.7 (s), 131.5 (d,  $J = 101.8$  Hz), 130.3 (t,  $J = 9.0$  Hz), 129.0 (d,  $J = 10.8$  Hz), 128.9 (s), 128.2 (s), 128.1 (s), 127.7 (s), 82.3 (s), 41.7 (d,  $J = 10.5$  Hz), 37.2 (d,  $J = 71.0$  Hz), 35.6 (s), 33.5 (s), 30.4 (s), 25.3 (s), 20.9 (s), 20.8 (s).  $^{31}\text{P}$  NMR (162 MHz,  $\text{CDCl}_3$ )  $\delta$  (ppm) 29.6. HRMS-ESI:  $m/z$  467.1750 ( $[\text{M}+\text{Na}]^+$ ,  $\text{C}_{28}\text{H}_{29}\text{NaO}_3\text{P}^+$  calcd. 467.1747).

**Diisopropyl ((2S,3R)-6-oxo-2-phenyltetrahydro-2H-pyran-3-yl)phosphonate (5t)**

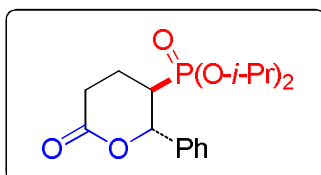

White solid.  $^1\text{H}$  NMR (400 MHz,  $\text{CDCl}_3$ )  $\delta$  (ppm) 7.38 – 7.30 (m, 5H), 5.53 (t,  $J = 7.9$  Hz, 1H), 4.64 – 4.52 (m, 2H), 2.83 – 2.74 (m, 1H), 2.61 – 2.53 (m, 1H), 2.46 – 2.36 (m, 1H), 2.26 – 2.17 (m, 2H), 1.24 (d,  $J = 6.2$  Hz, 3H), 1.15 (d,  $J = 6.2$  Hz, 6H), 1.08 (d,  $J = 6.2$  Hz, 3H).  $^{13}\text{C}$  NMR (100 MHz,  $\text{CDCl}_3$ )  $\delta$  (ppm) 170.7 (s), 138.7 (d,  $J = 4.8$  Hz), 128.9 (s), 128.6 (s), 127.3 (s), 81.2 (s), 71.46 (d,  $J = 7.1$  Hz), 71.0 (d,  $J = 7.2$  Hz), 38.7 (d,  $J = 144.1$  Hz), 28.8 (d,  $J = 9.3$  Hz), 24.0 (m), 23.65 (d,  $J = 3.7$  Hz), 19.76 (d,  $J = 3.8$  Hz).  $^{31}\text{P}$  NMR (162 MHz,  $\text{CDCl}_3$ )  $\delta$  (ppm) 23.8. HRMS-ESI:  $m/z$  341.1511 ( $[\text{M}+\text{H}]^+$ ,  $\text{C}_{17}\text{H}_{26}\text{O}_5\text{P}^+$  calcd. 341.1512).

## 6. $^1\text{H}$ , $^{13}\text{C}$ , and $^{31}\text{P}$ NMR spectra

3a

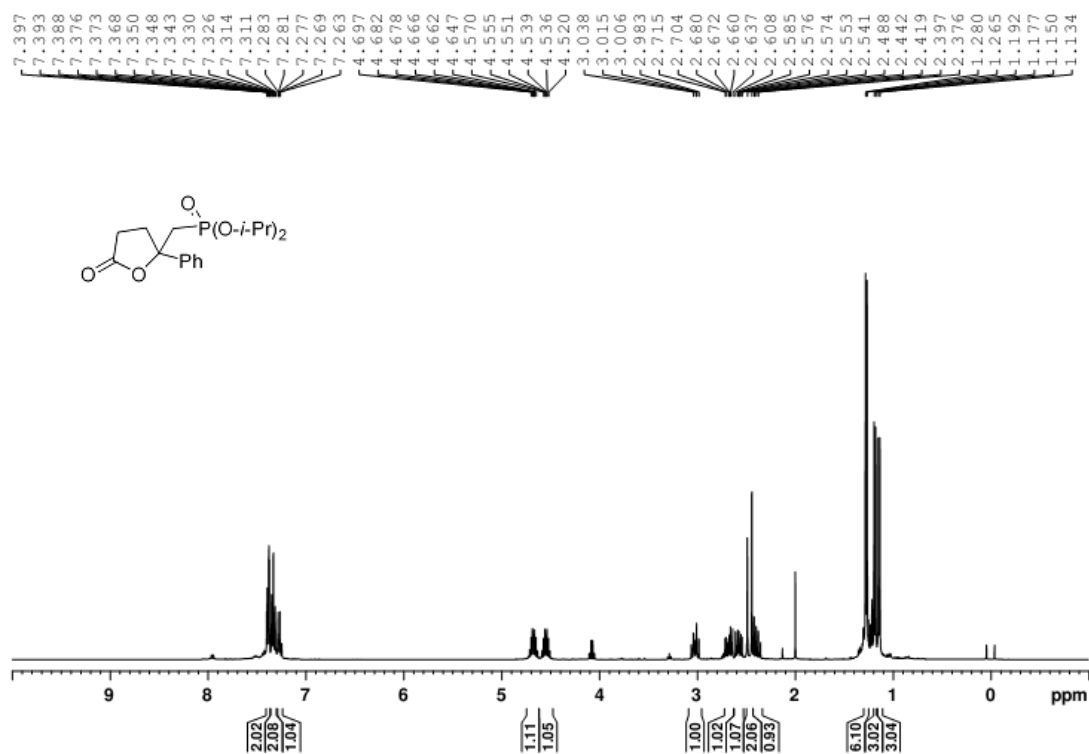

3a

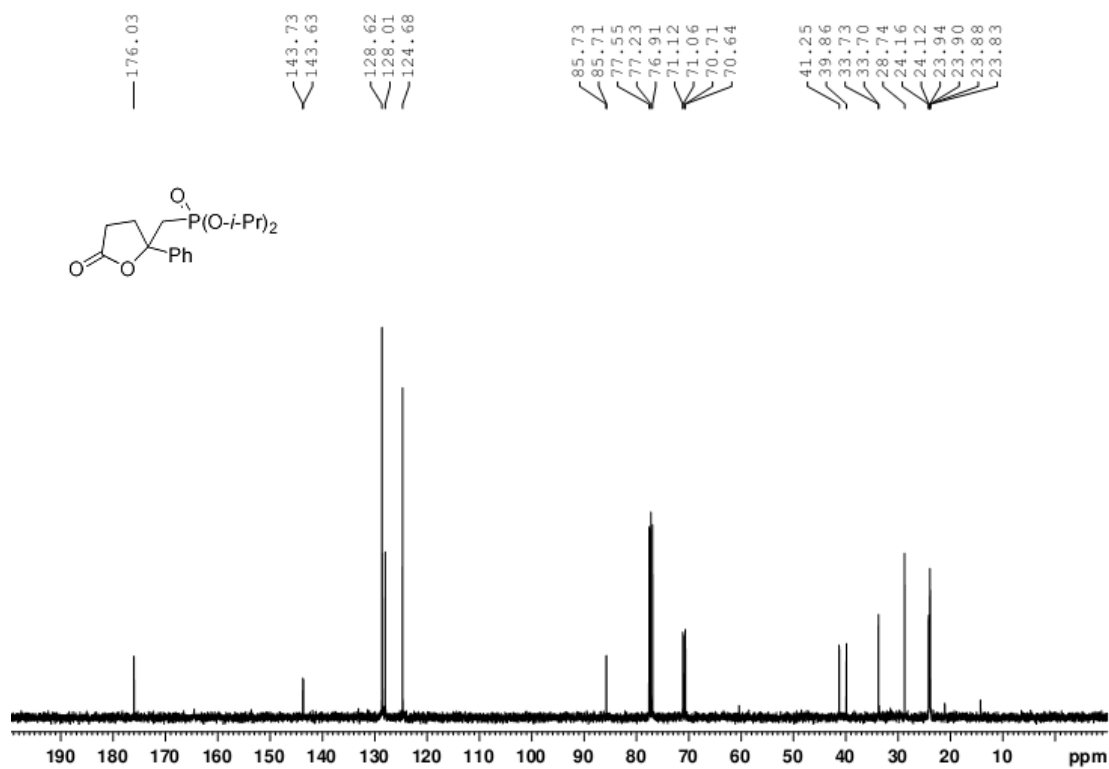

3b

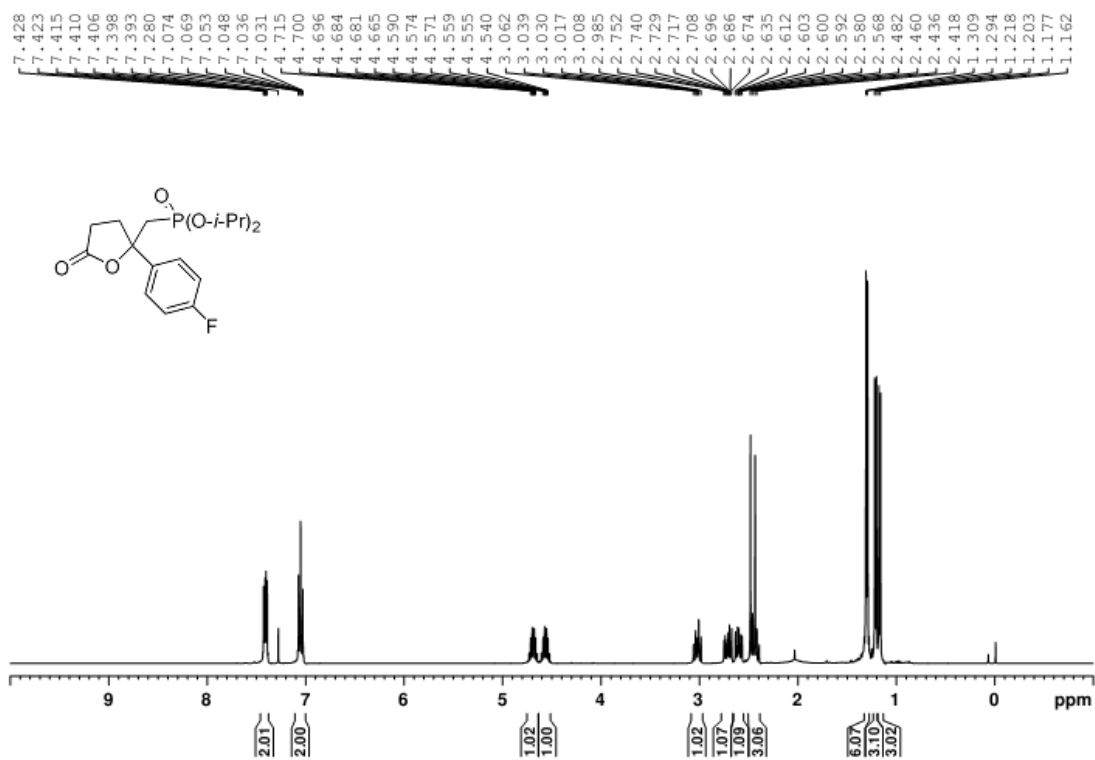

3b

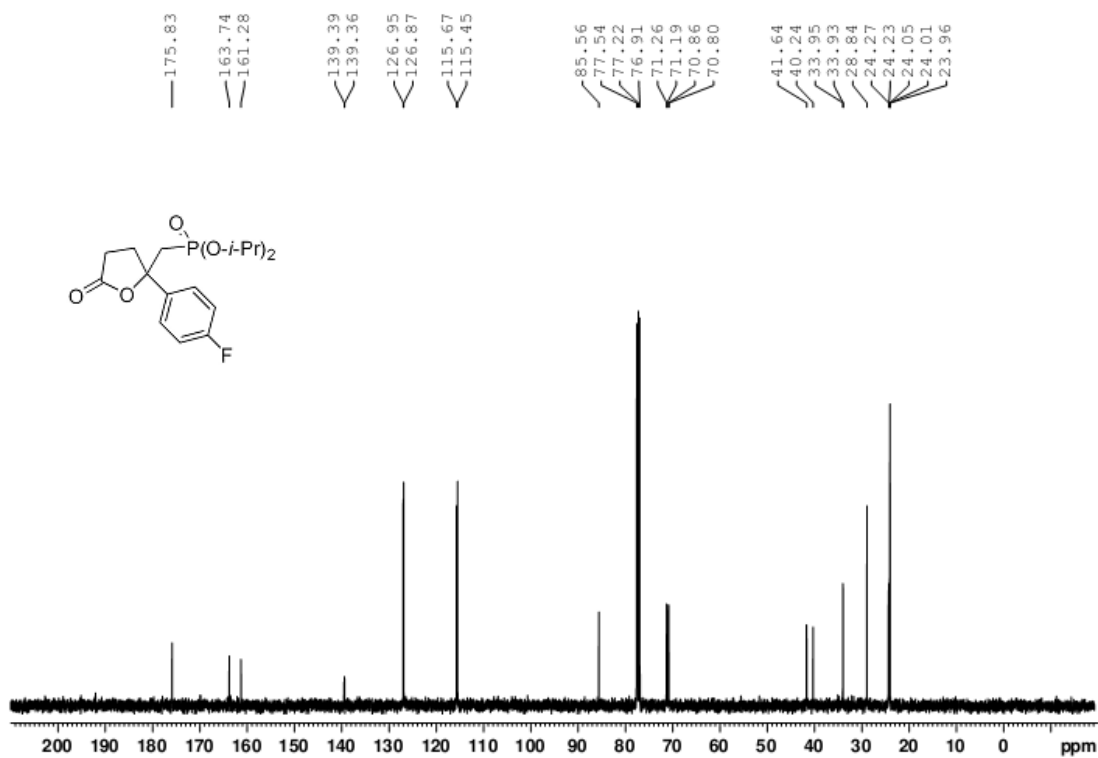

3c

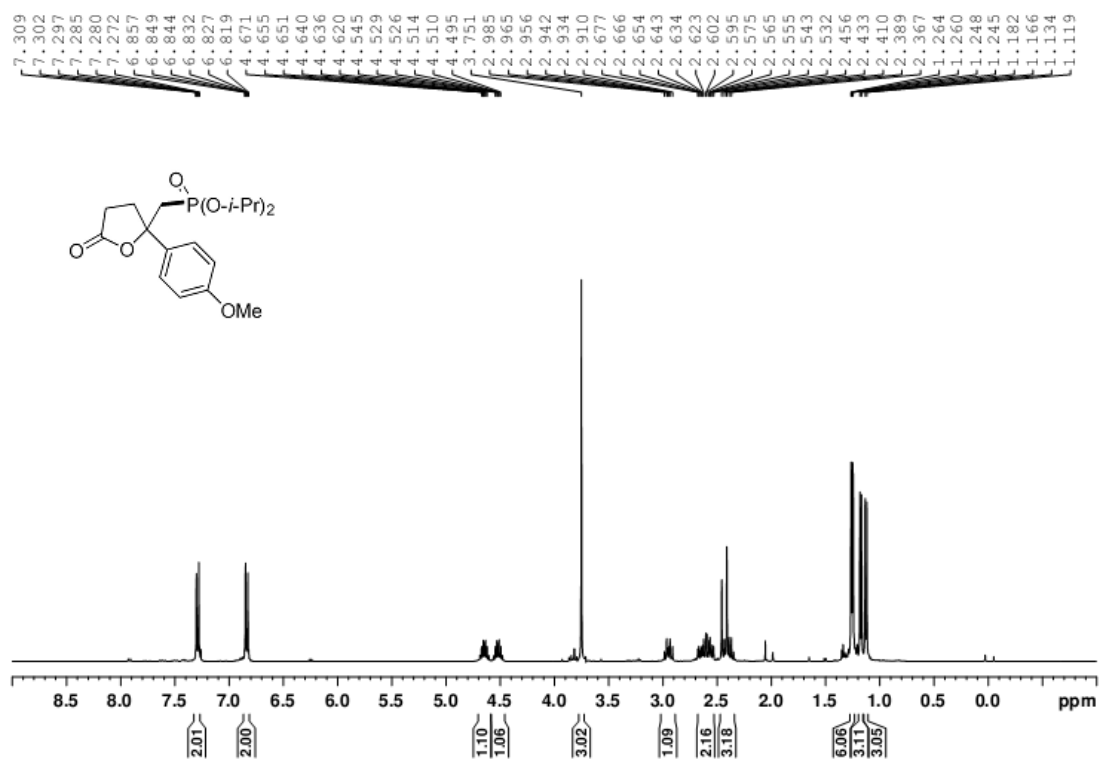

3c

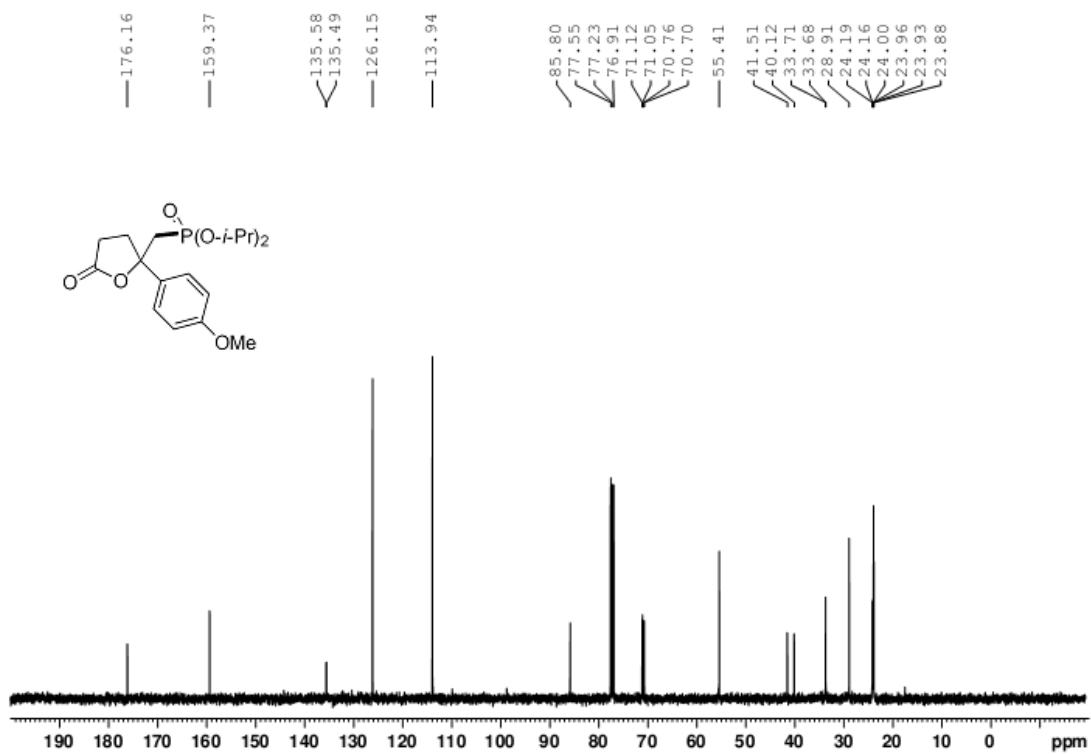

3d

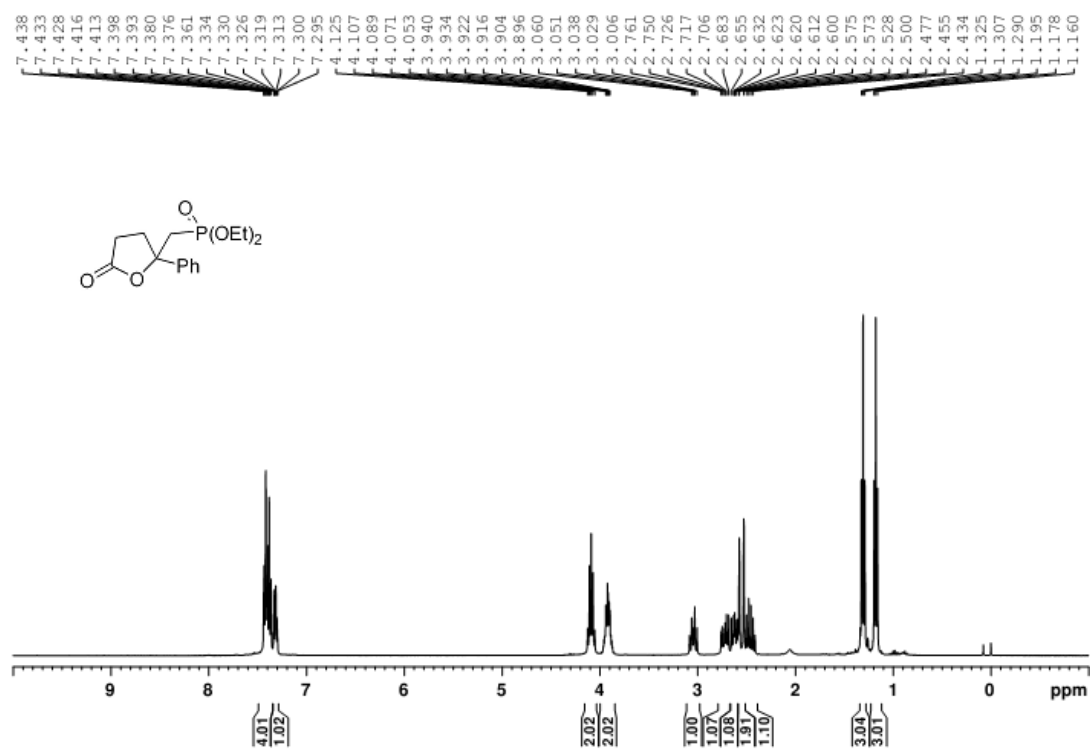

3d

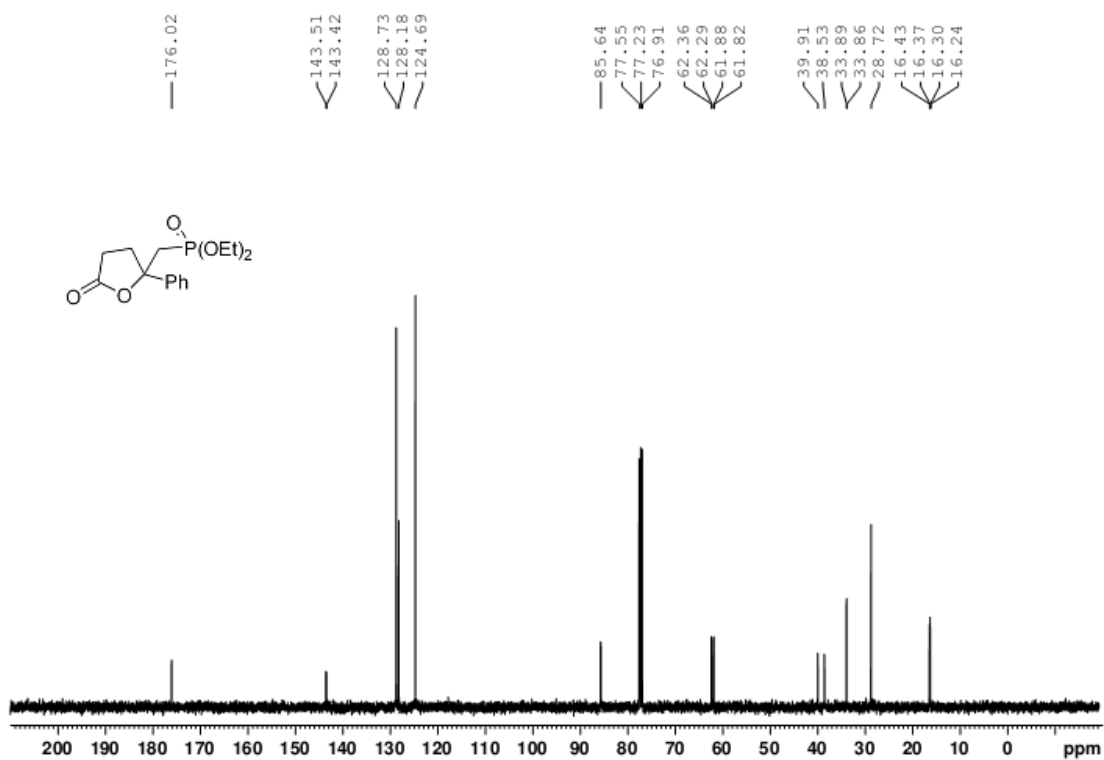



3e

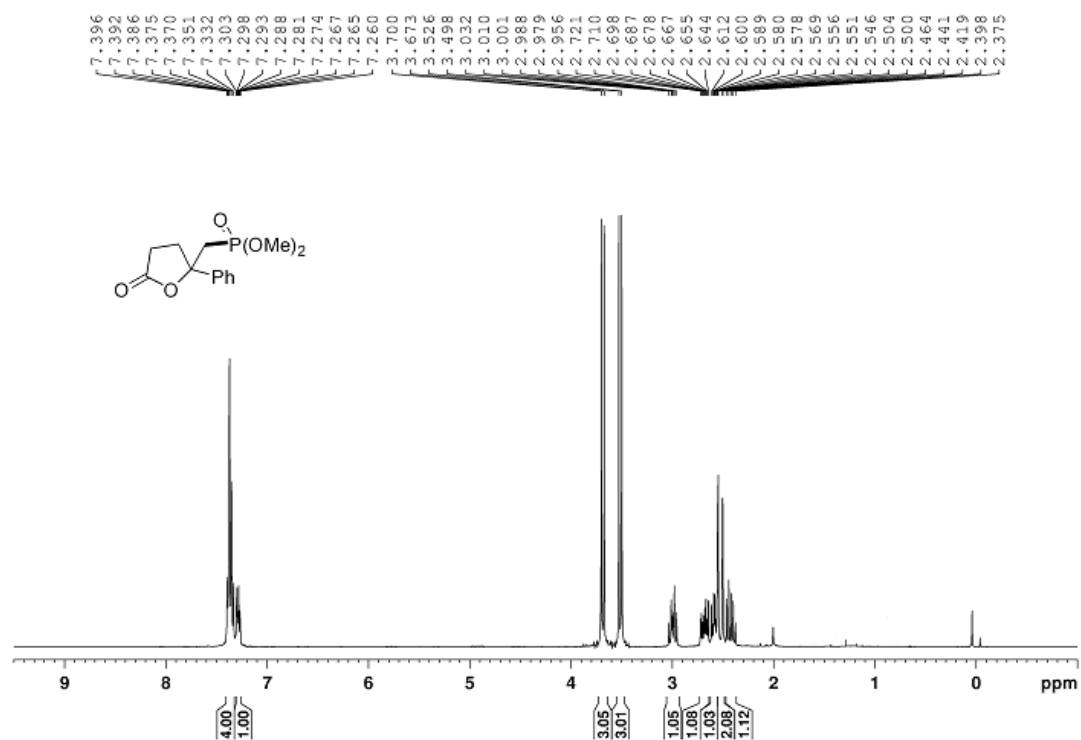

3e

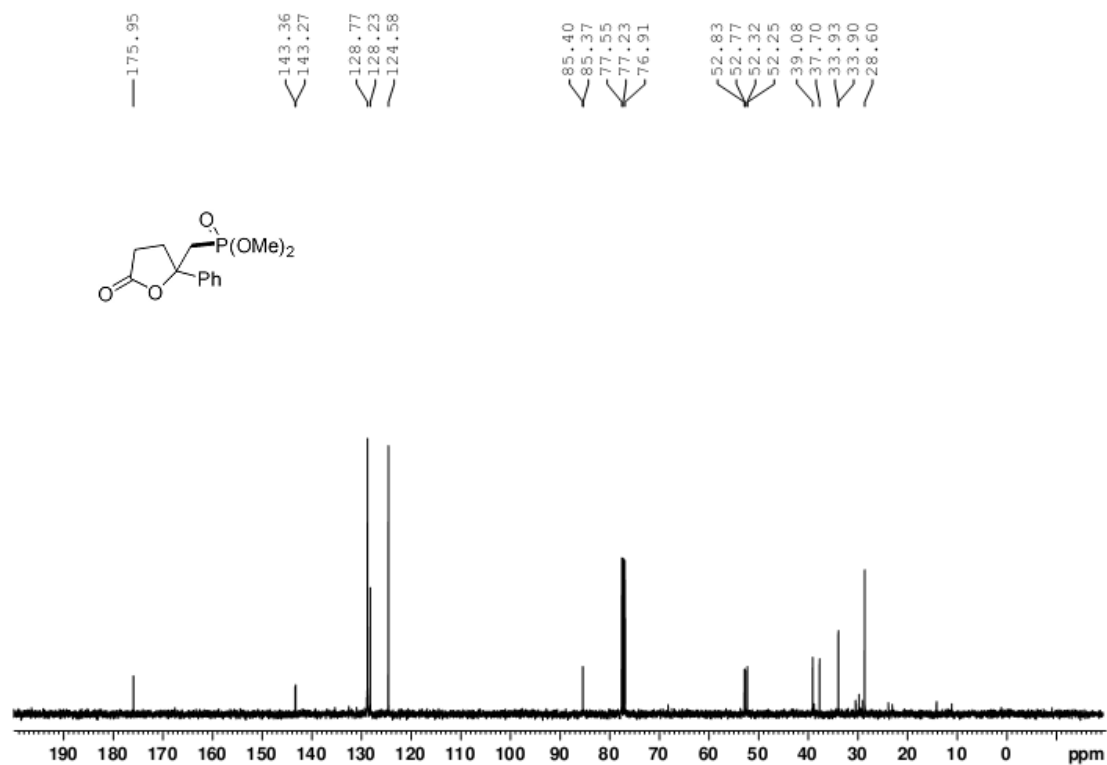

3f

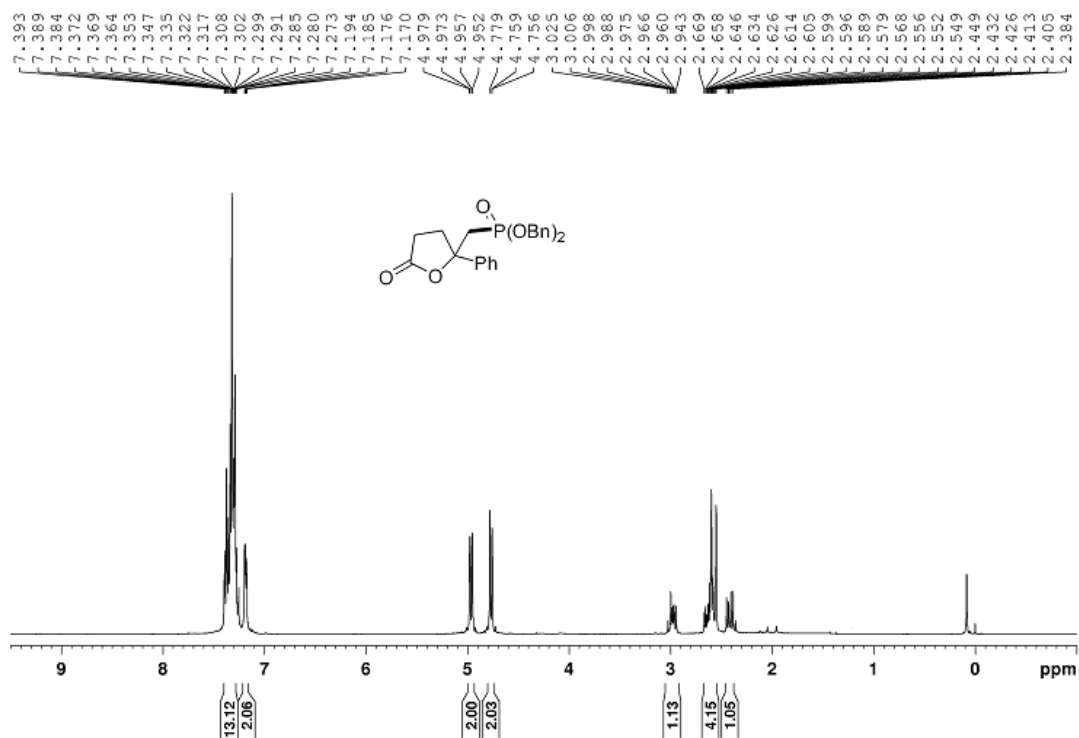

3f

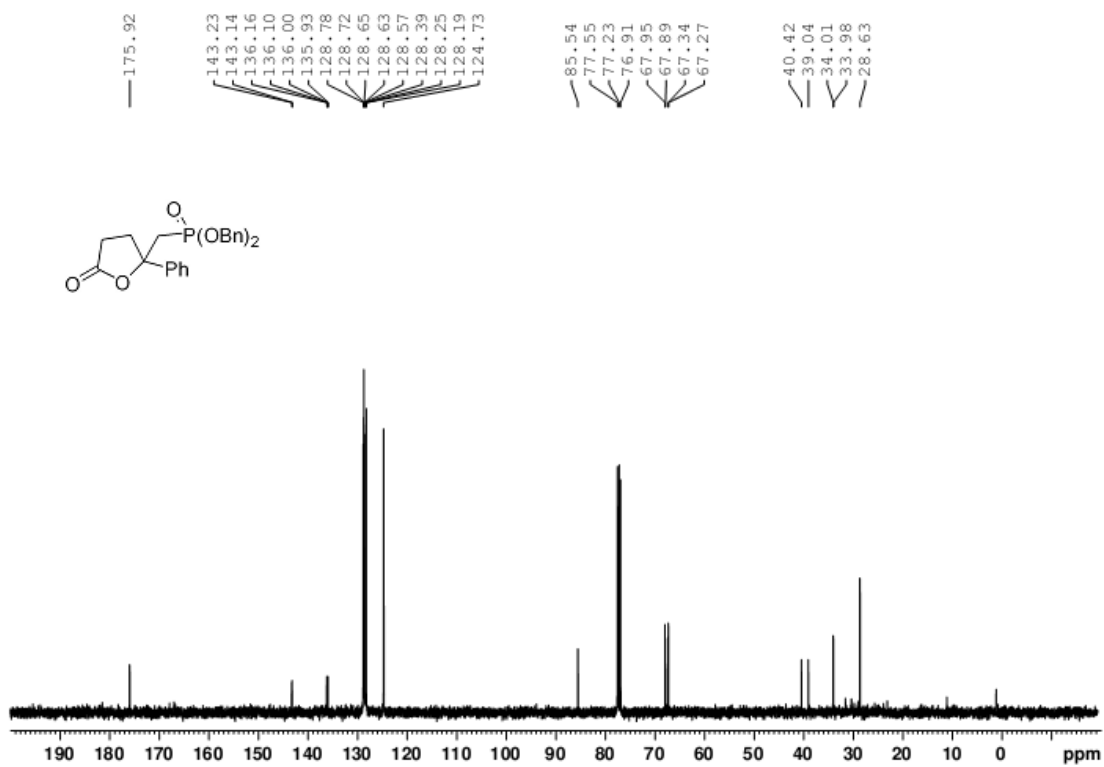

3g

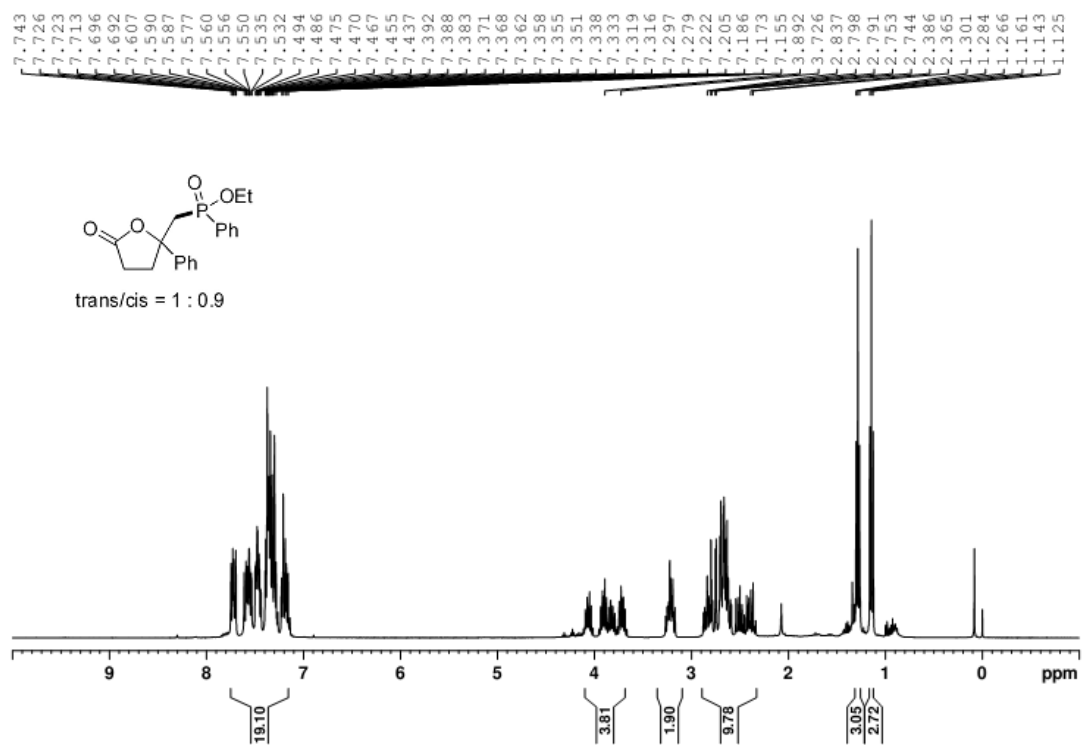

3g

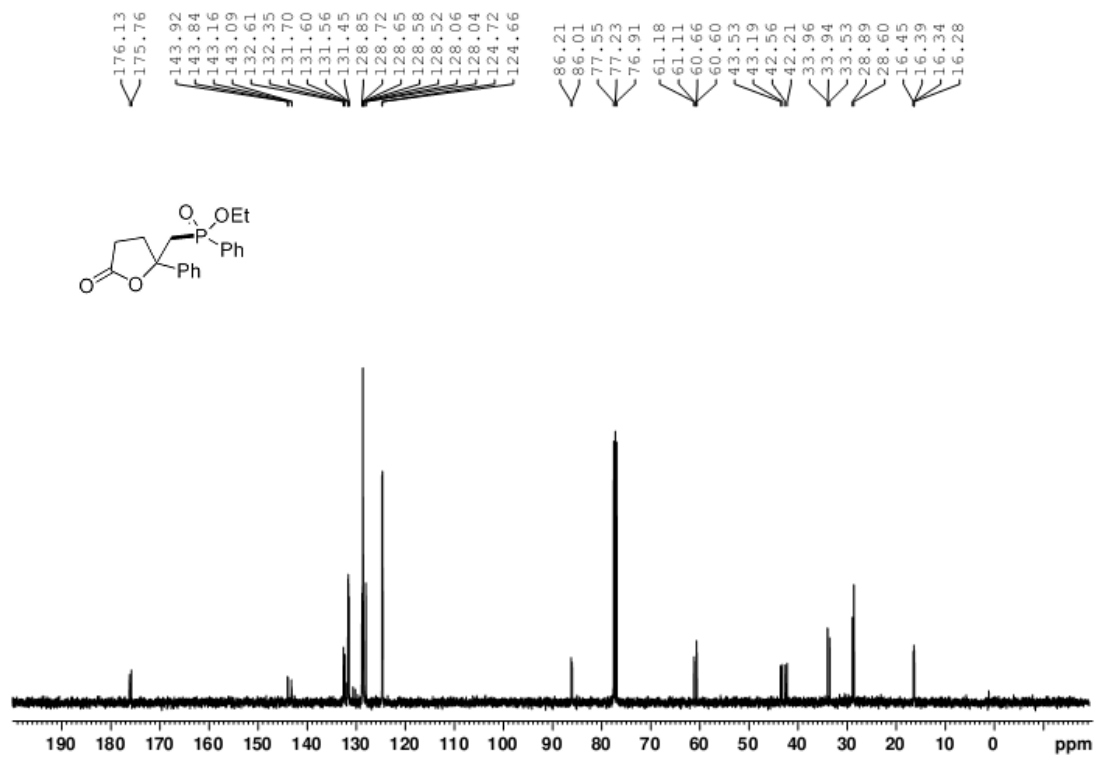

3h

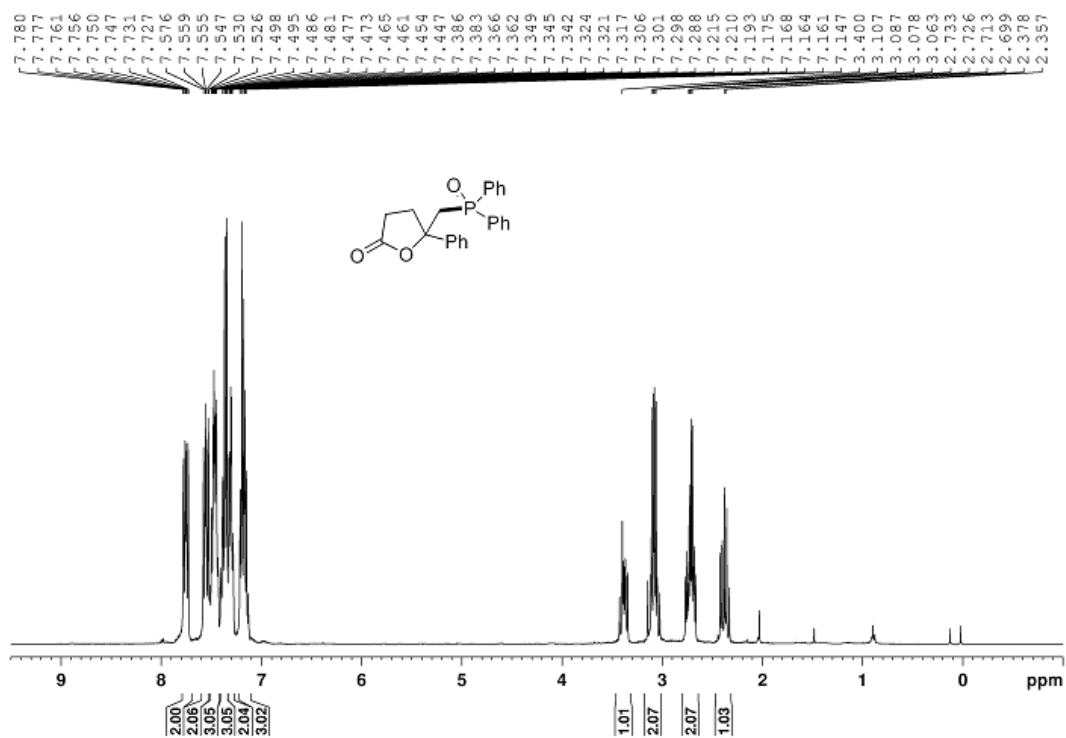

3h

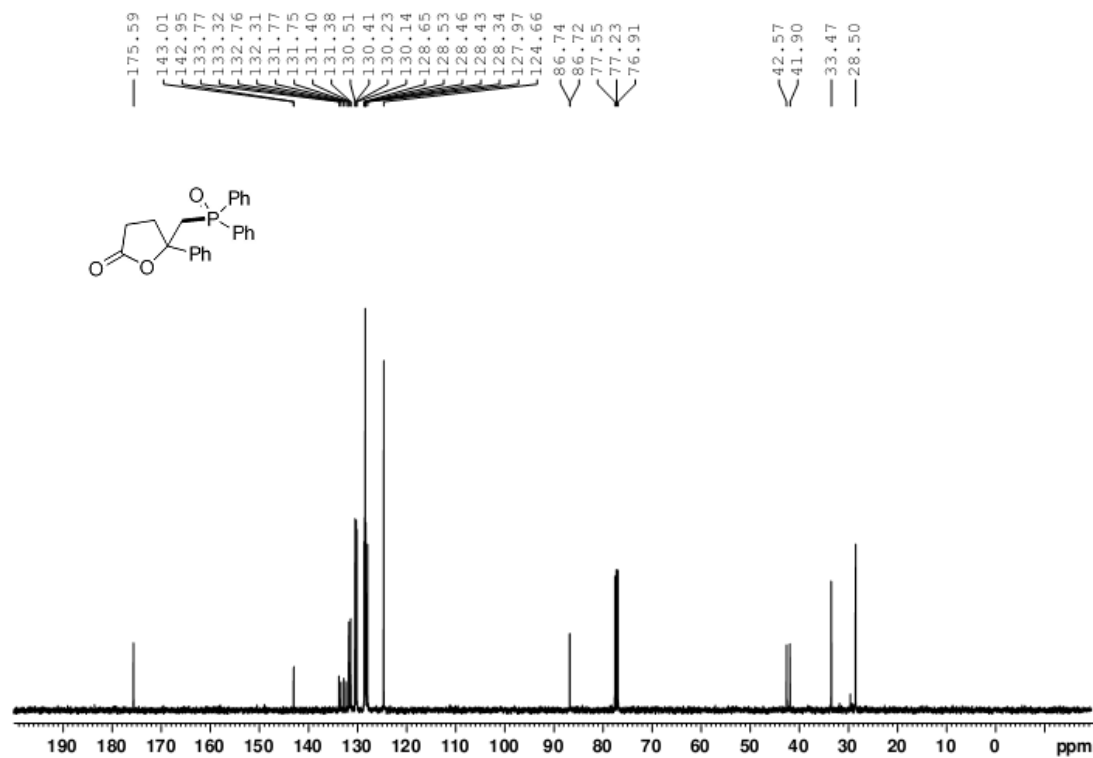

3i

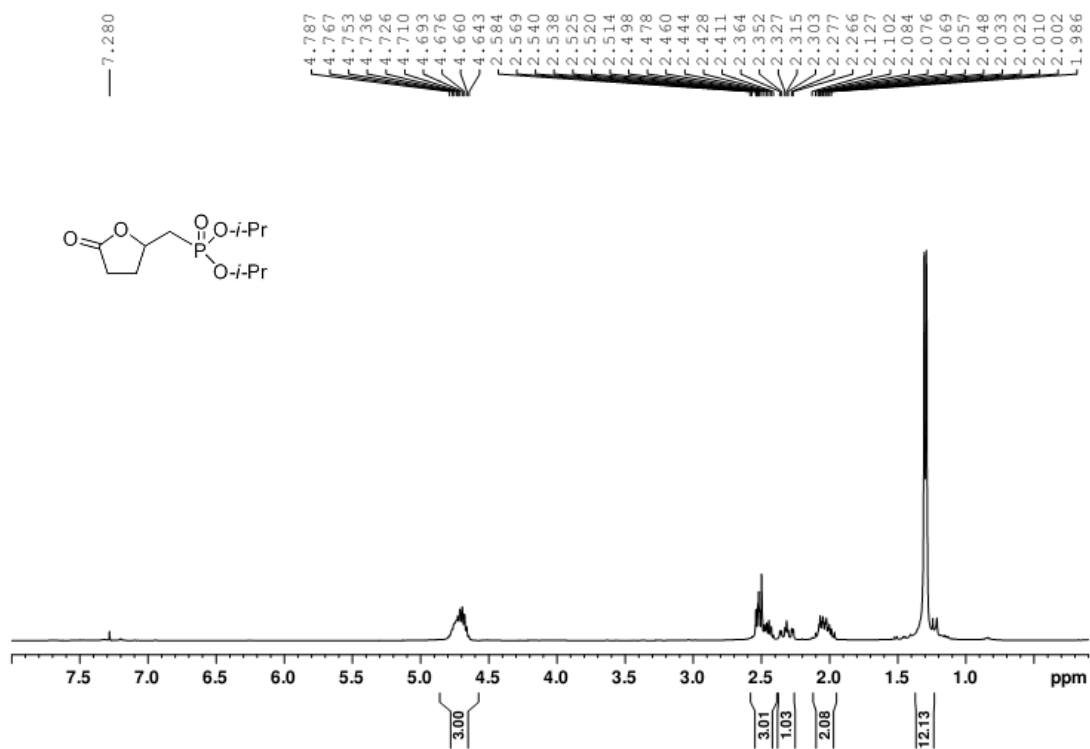

3i

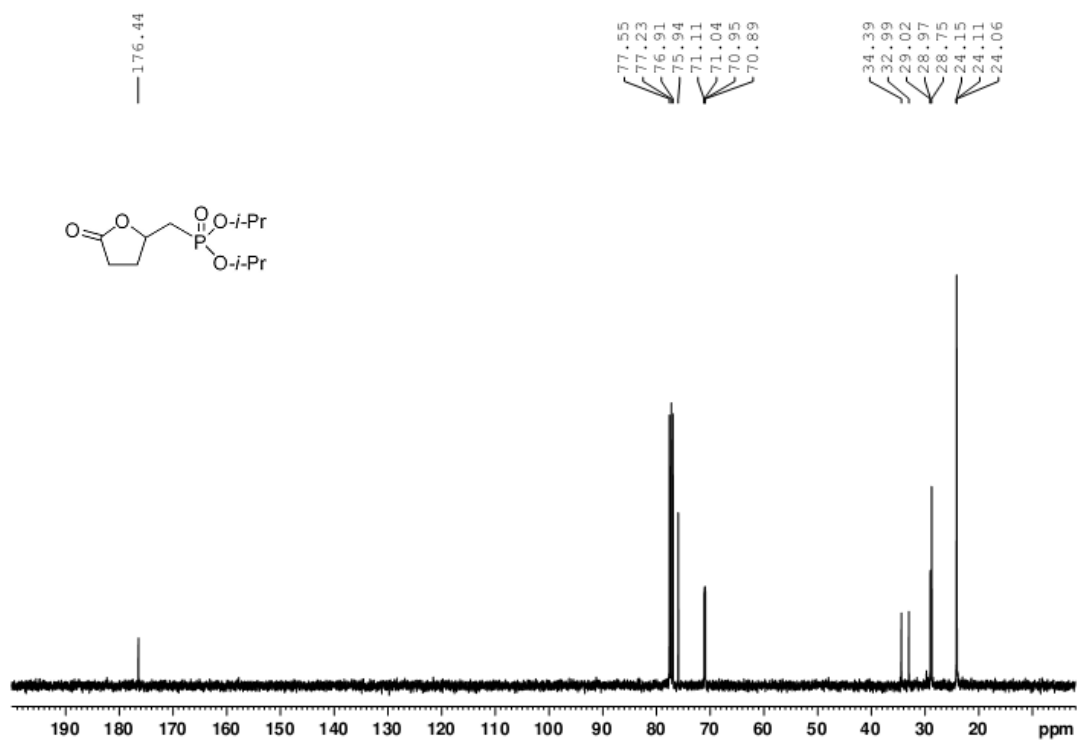

5a

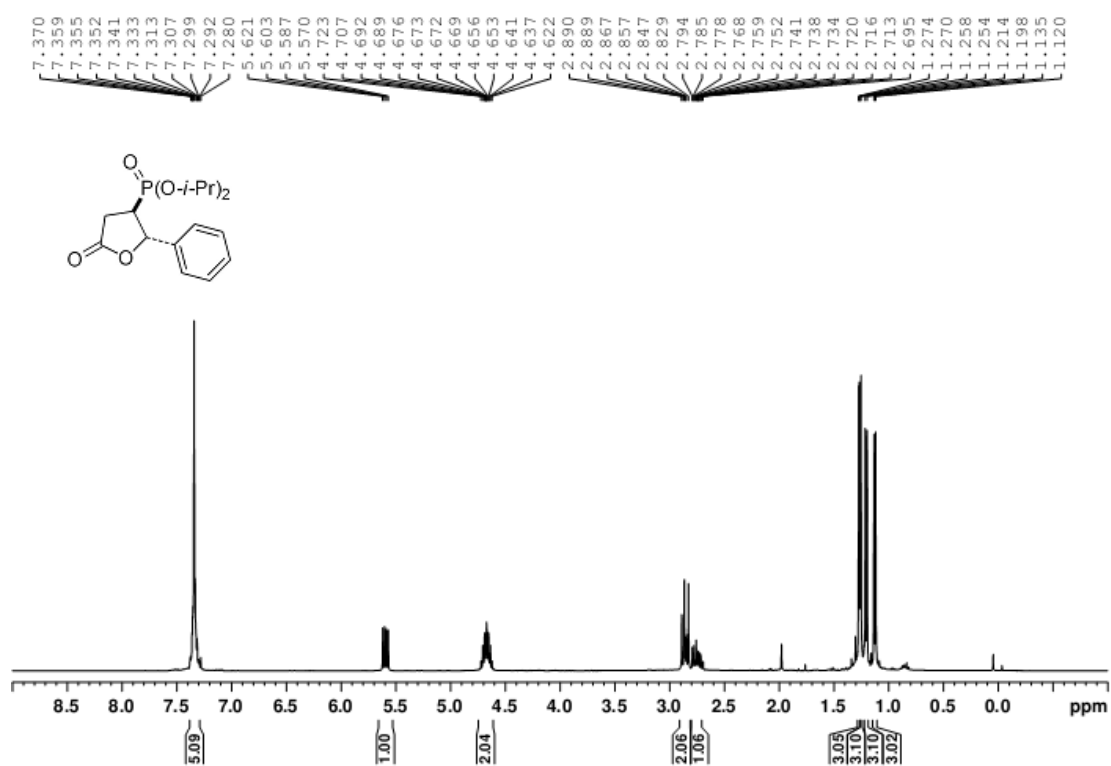

5a

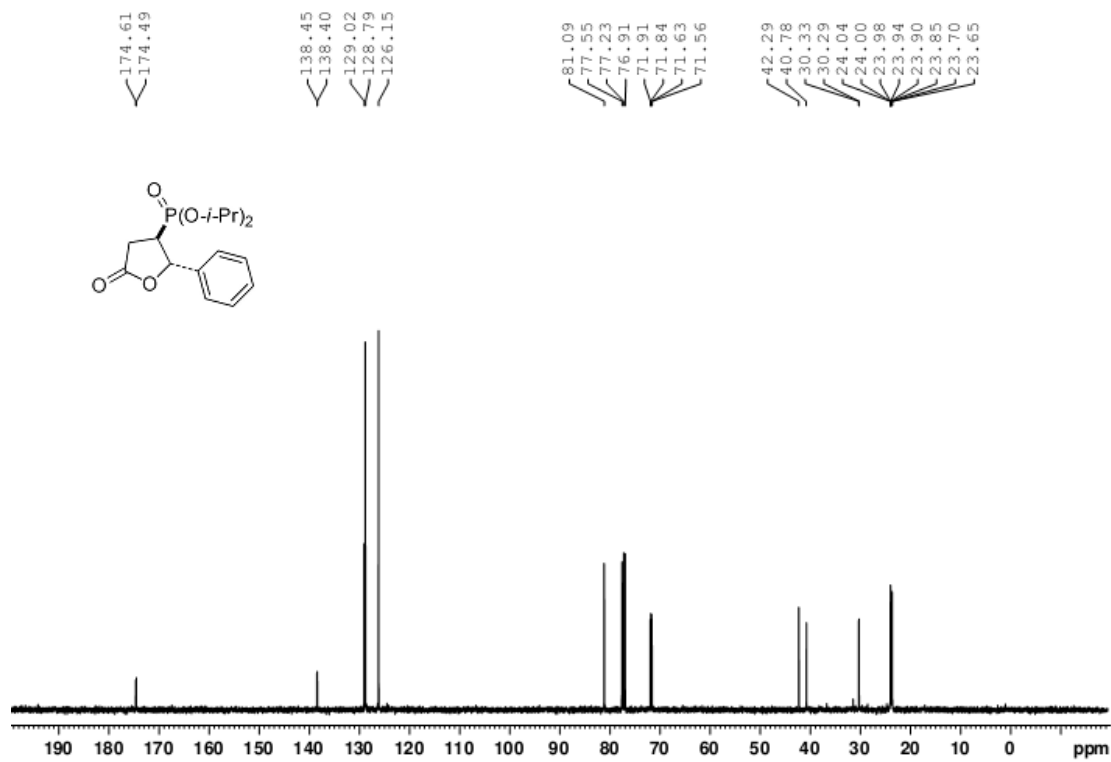

5b

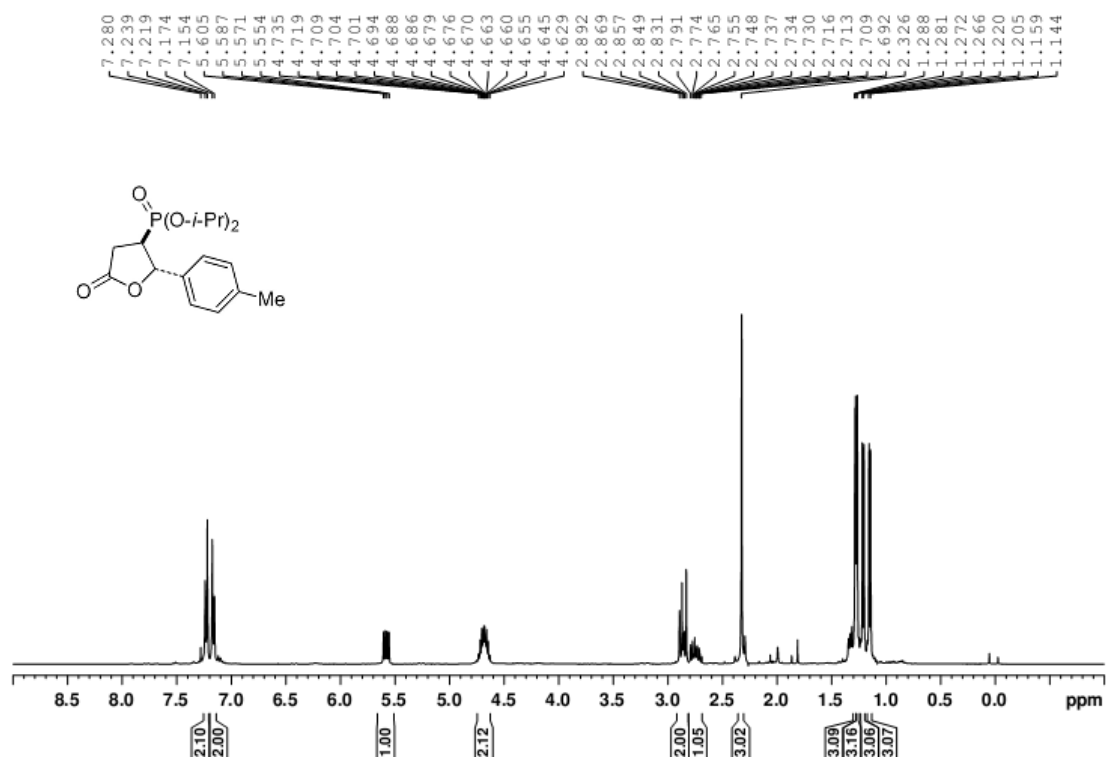

5b

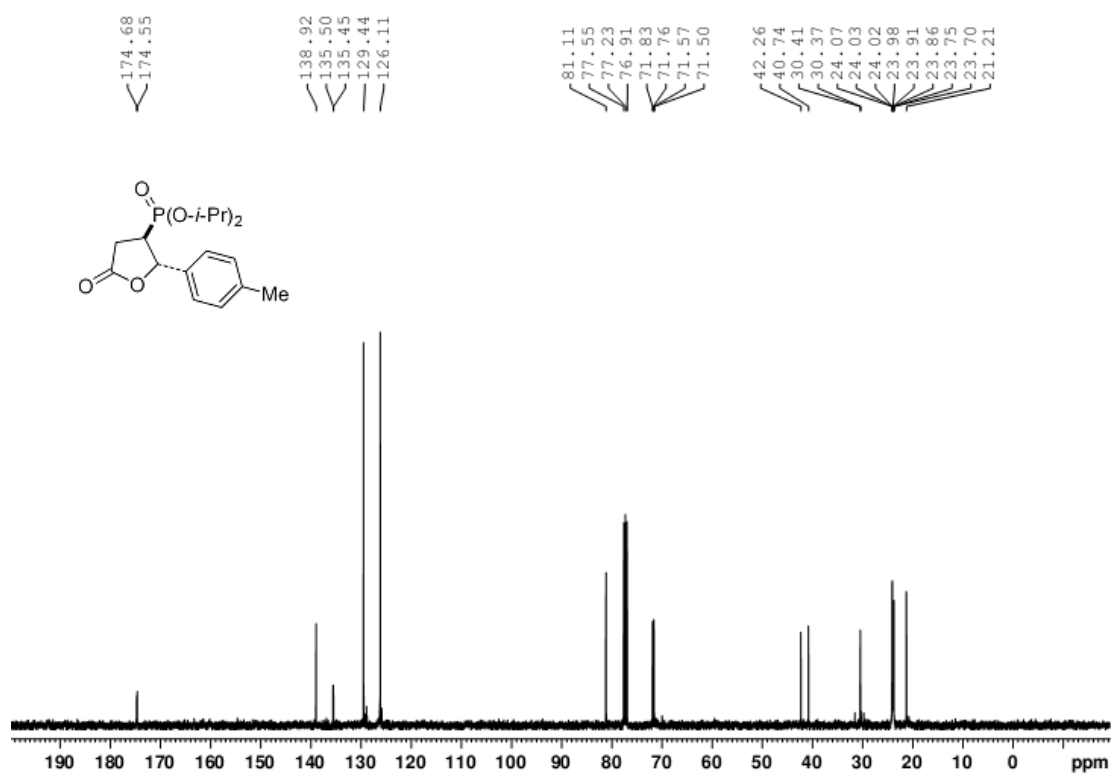

5c

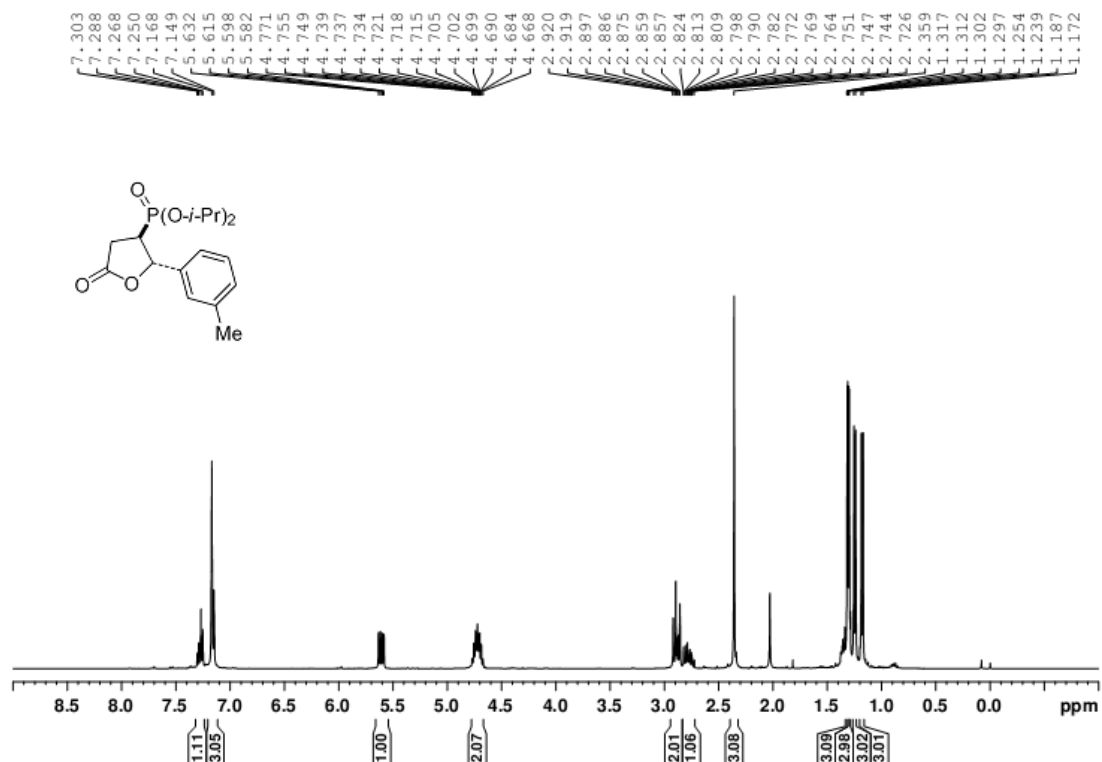

5c

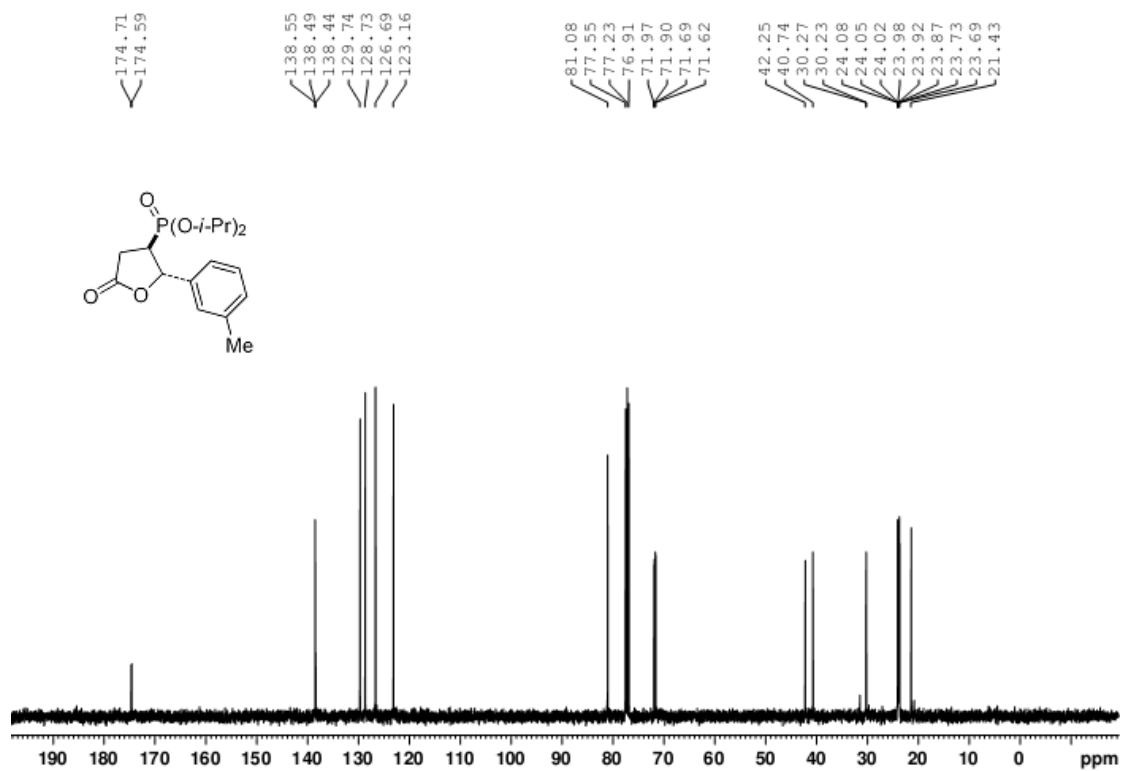



5d

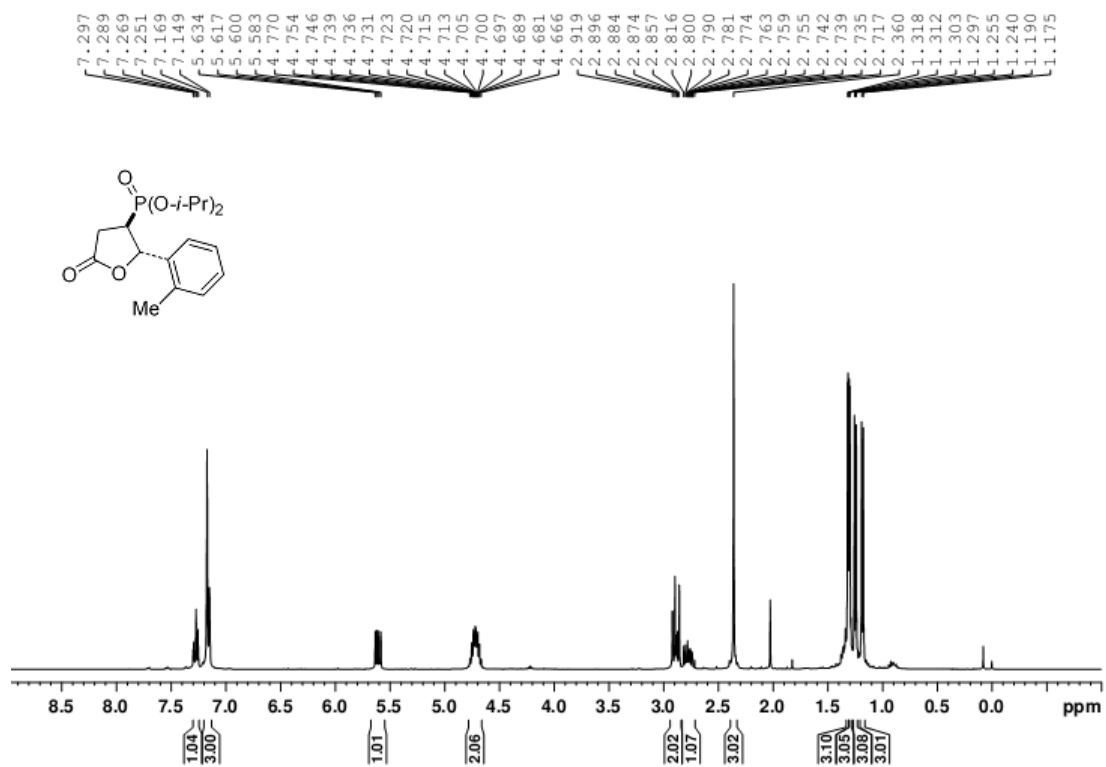

5d

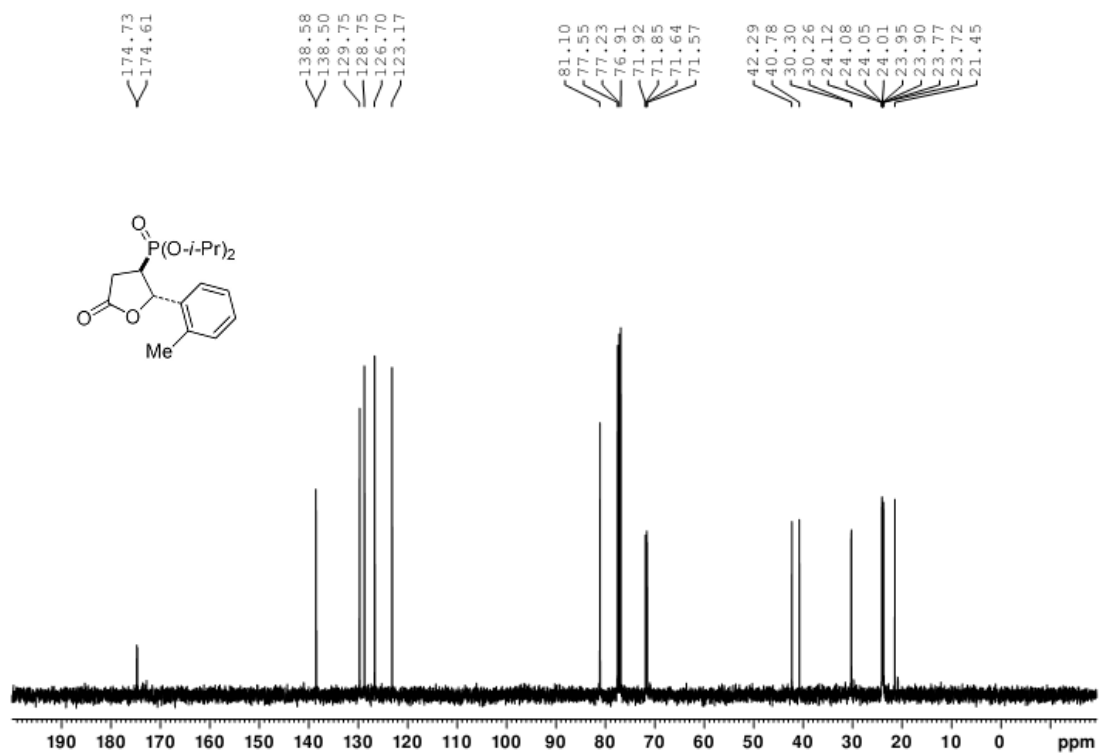

5e

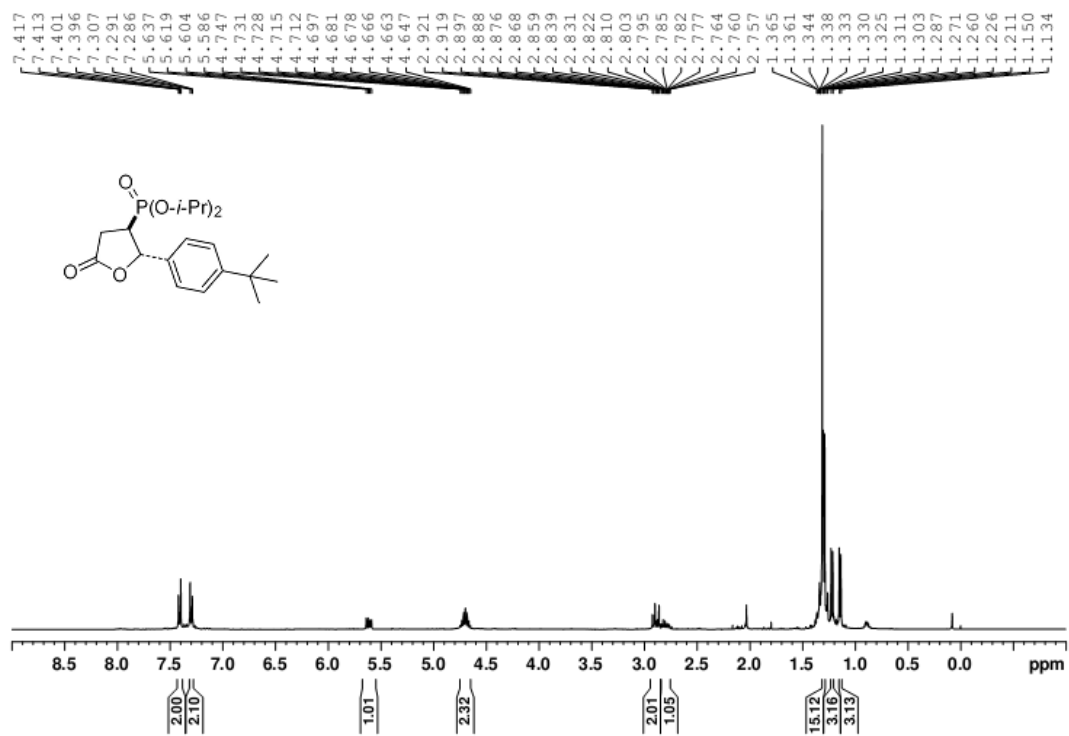

5e

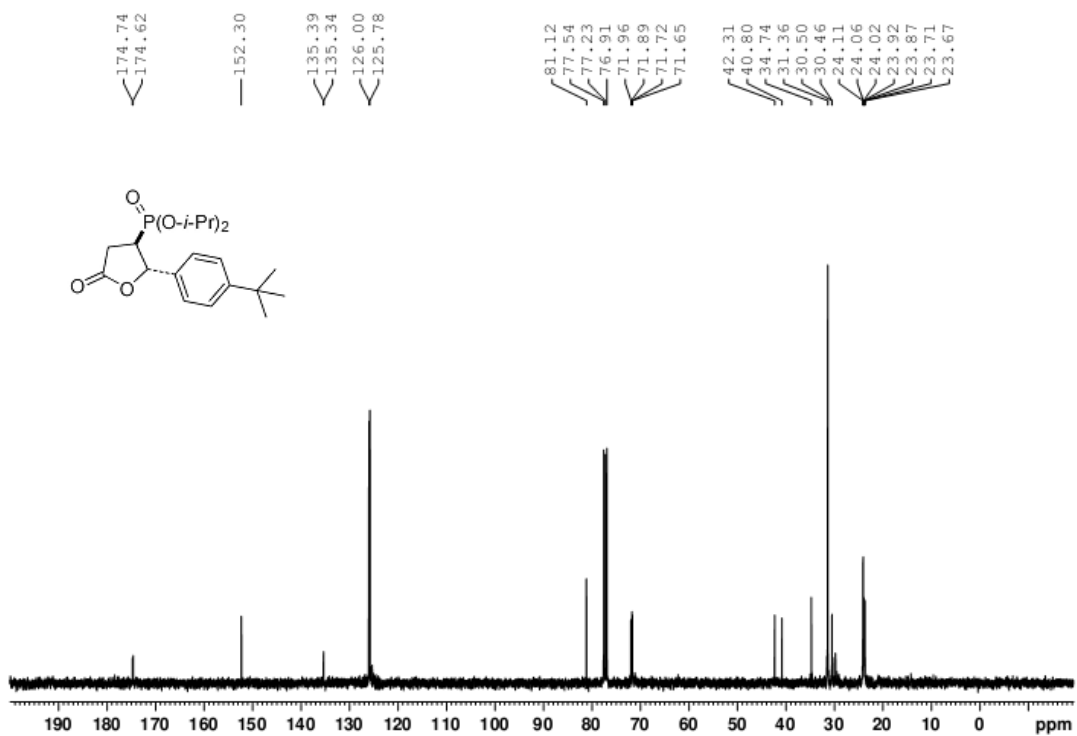

5f

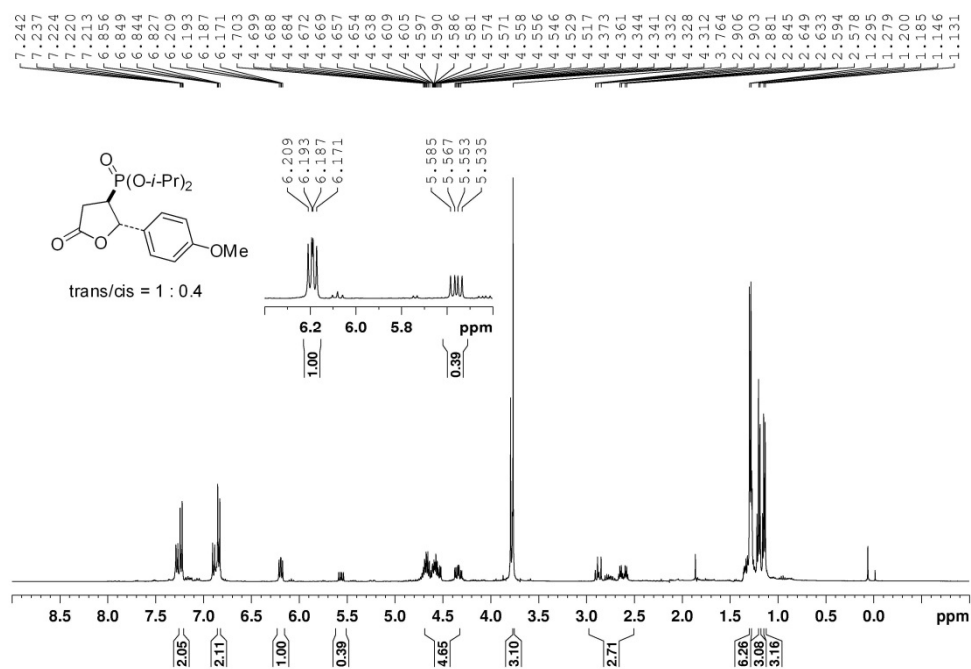

5f

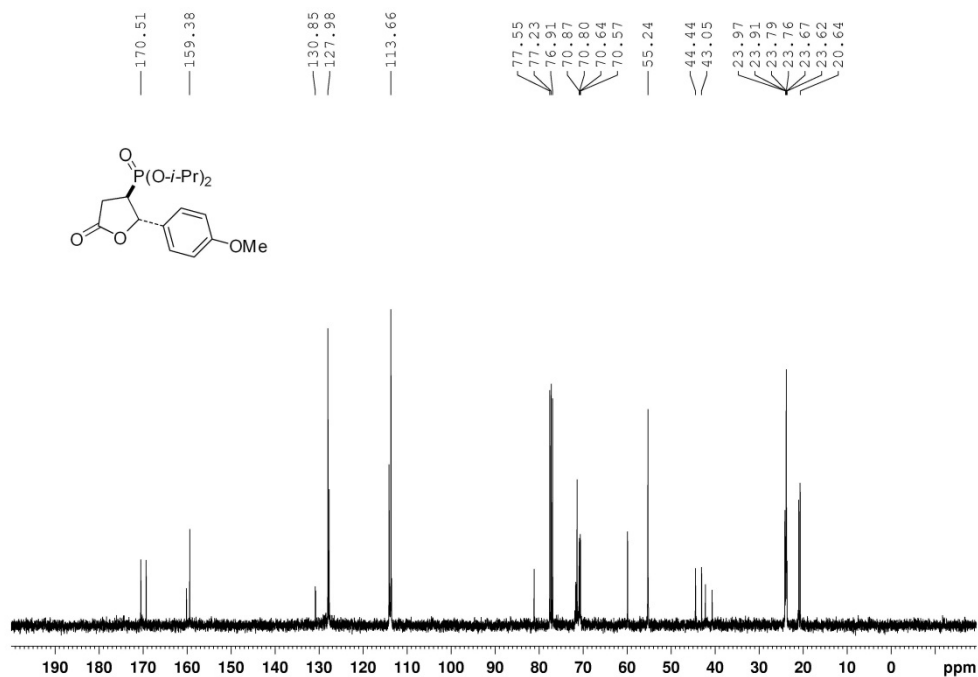

5g

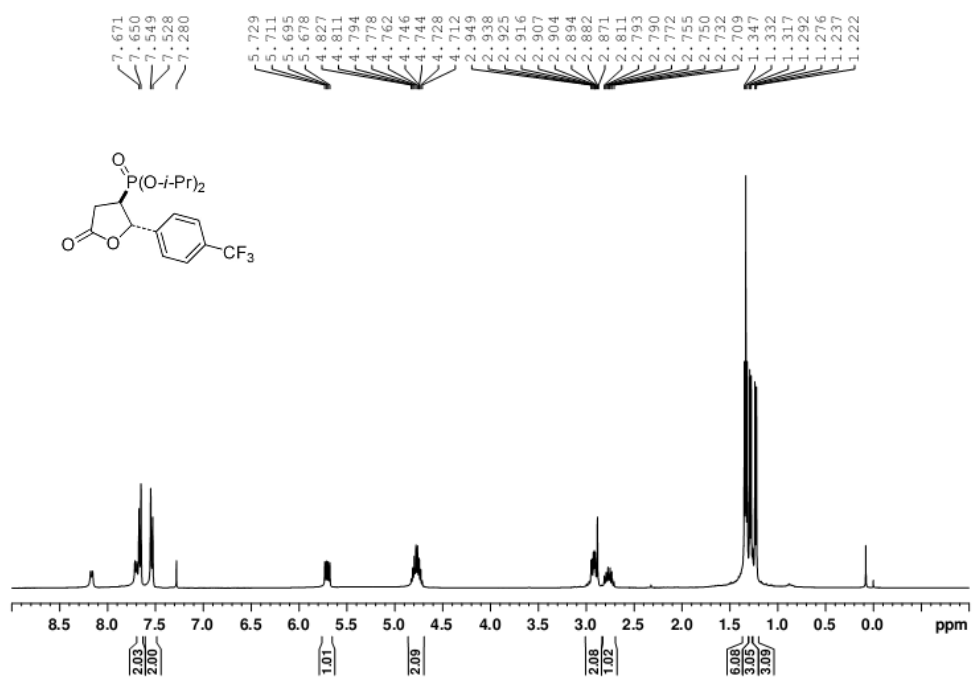

5g

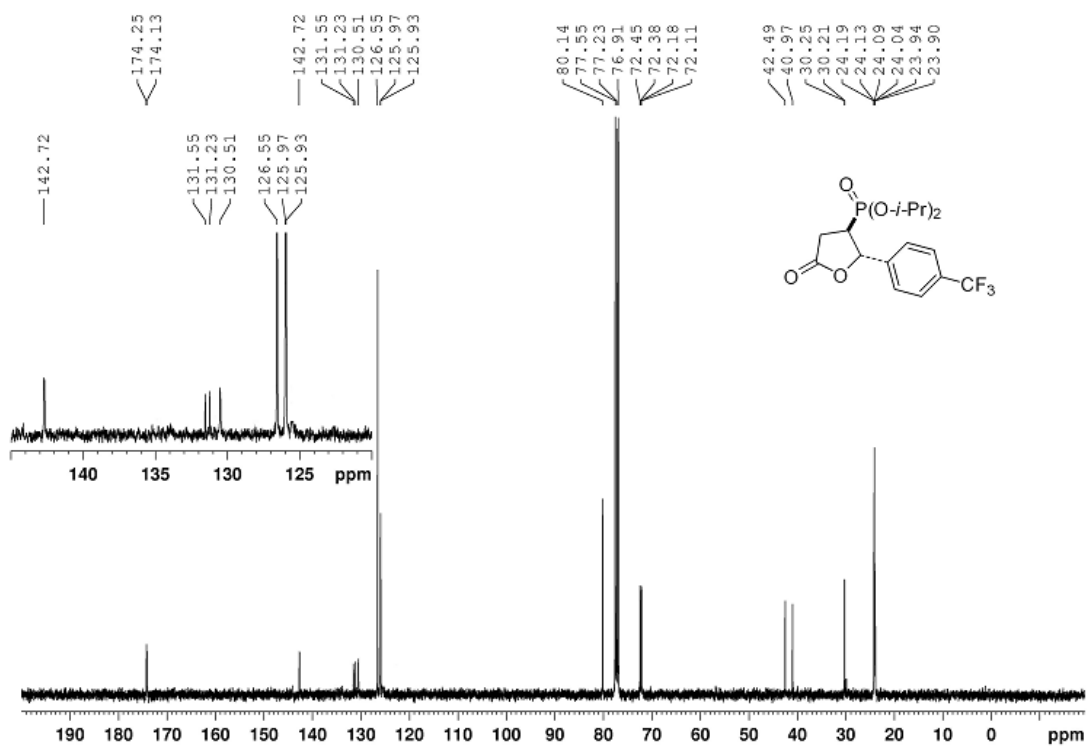

5h

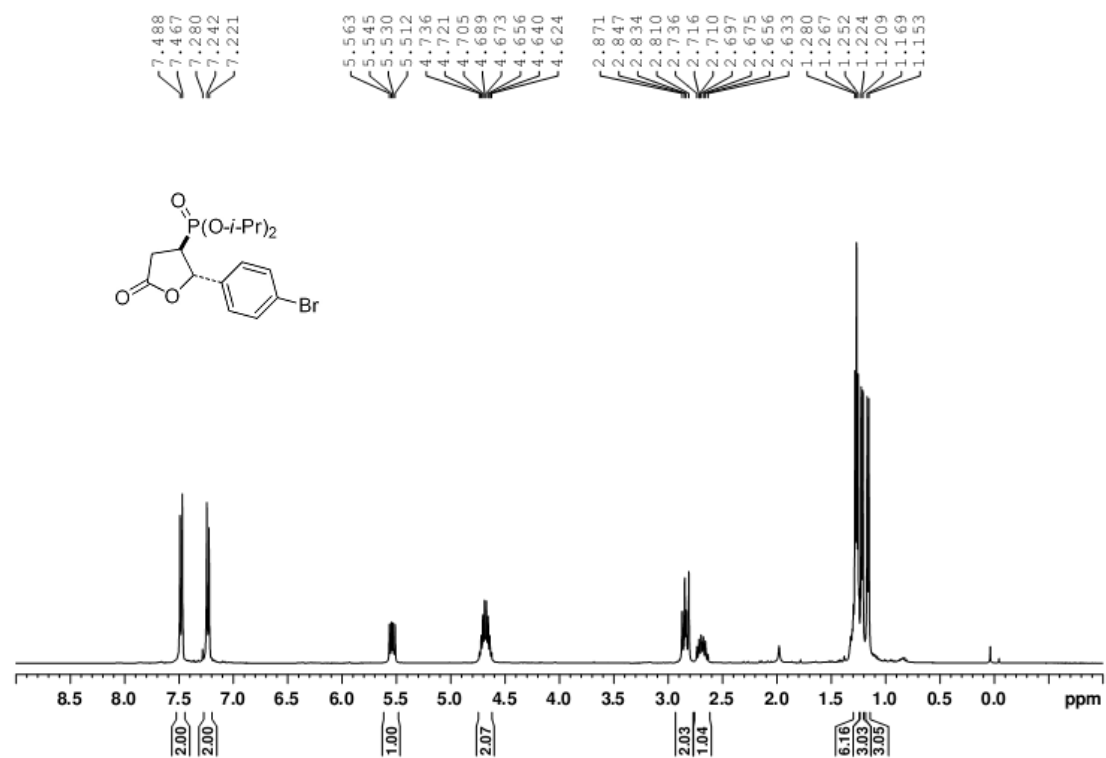

5h

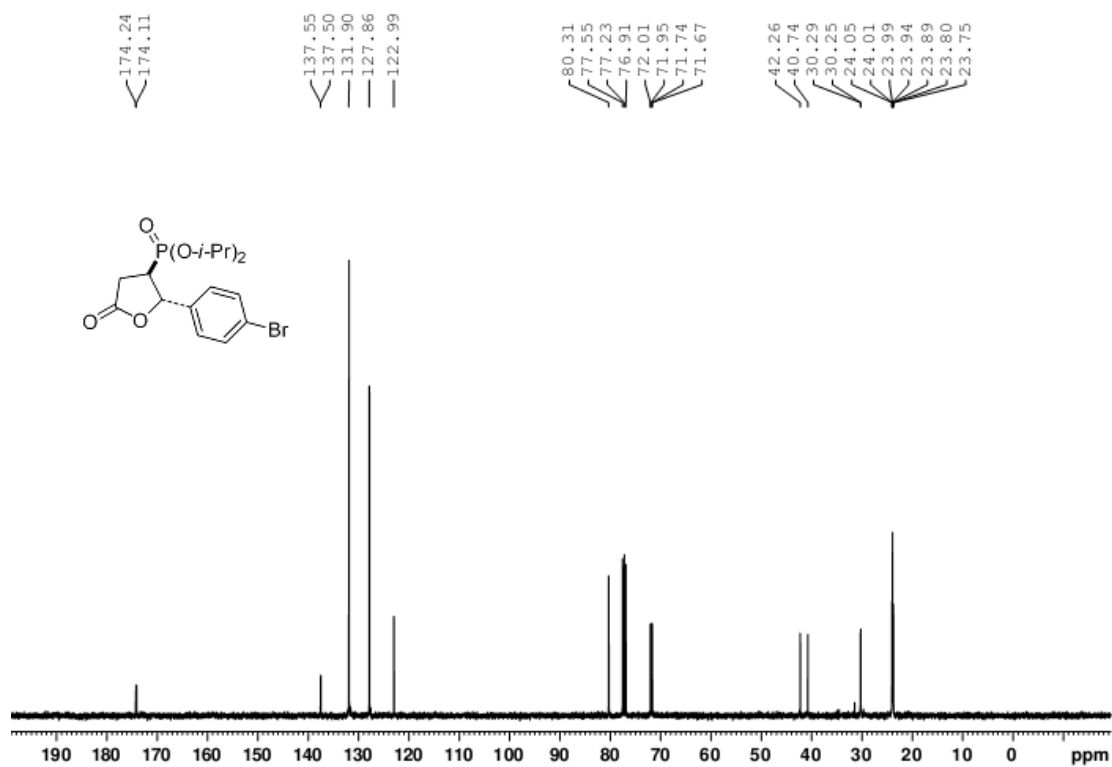

5i

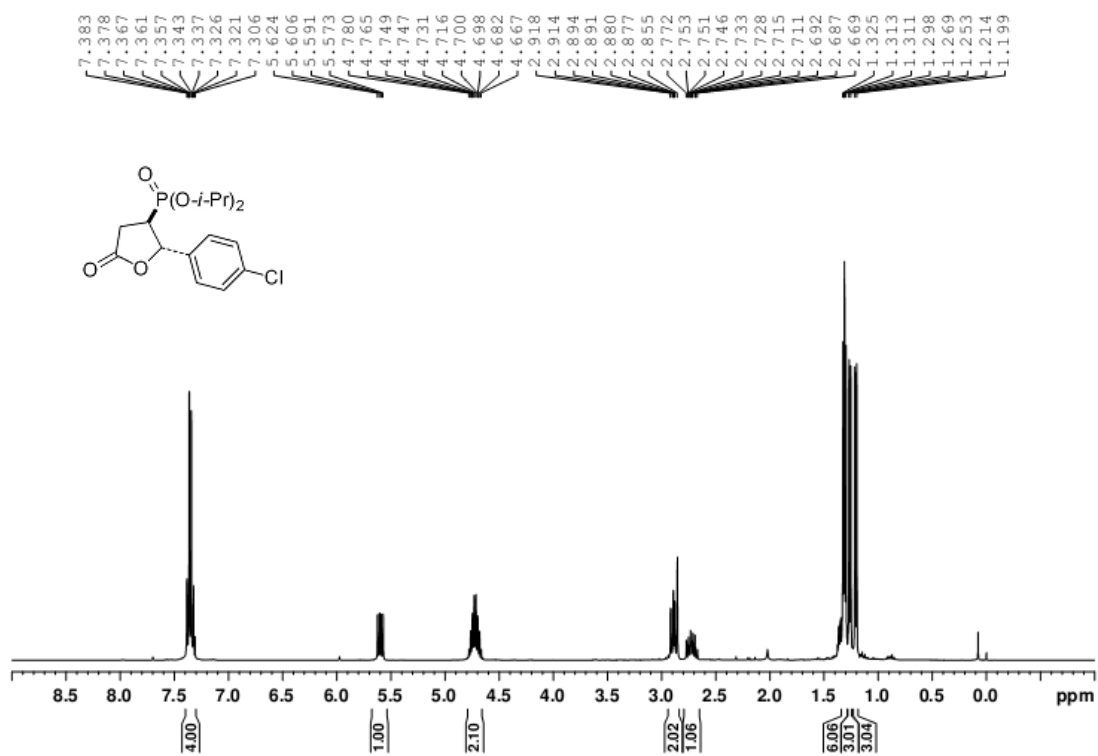

5i

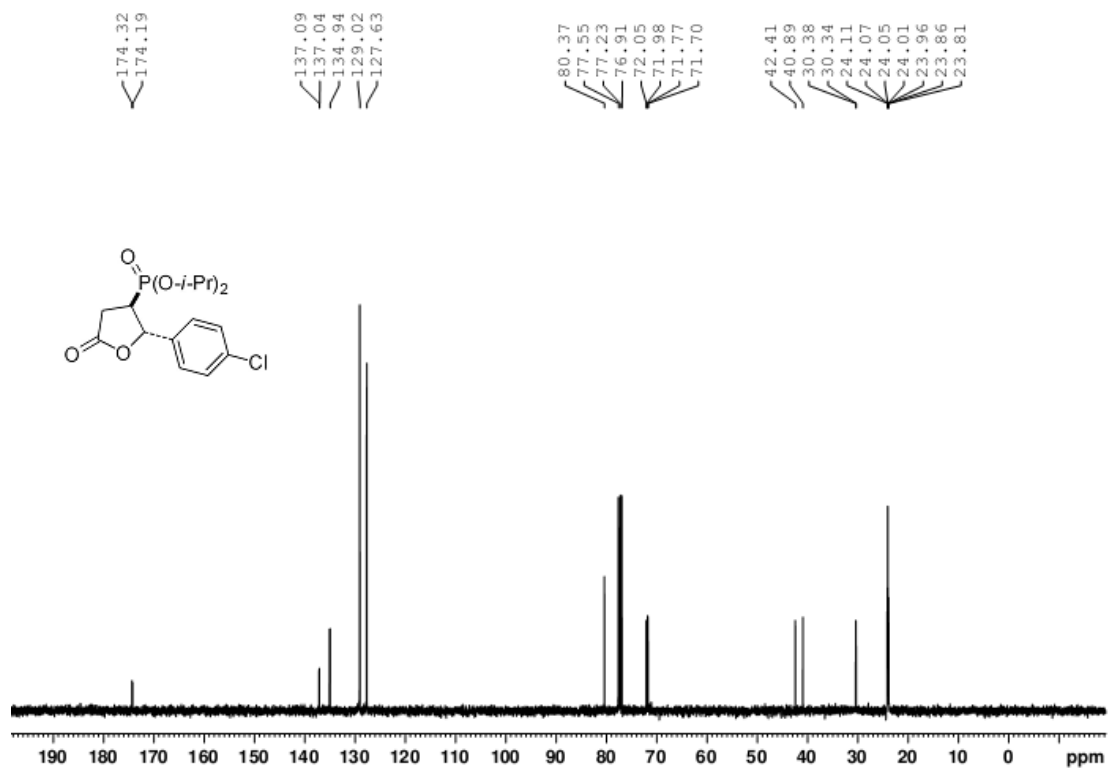

5j

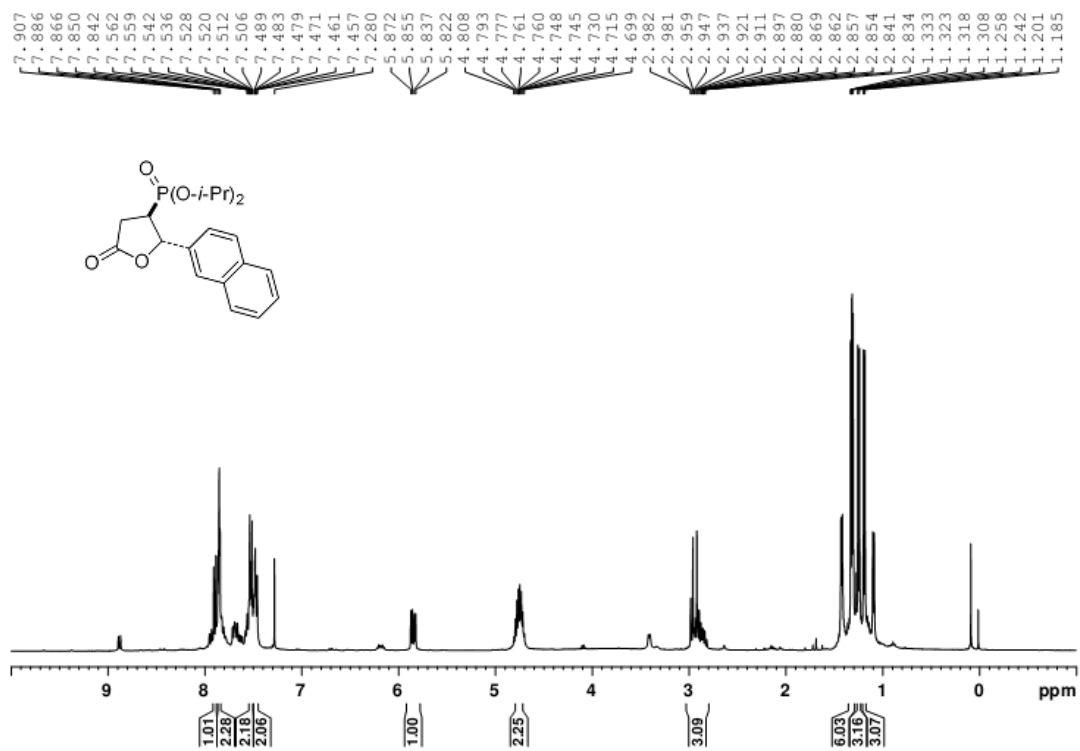

5j

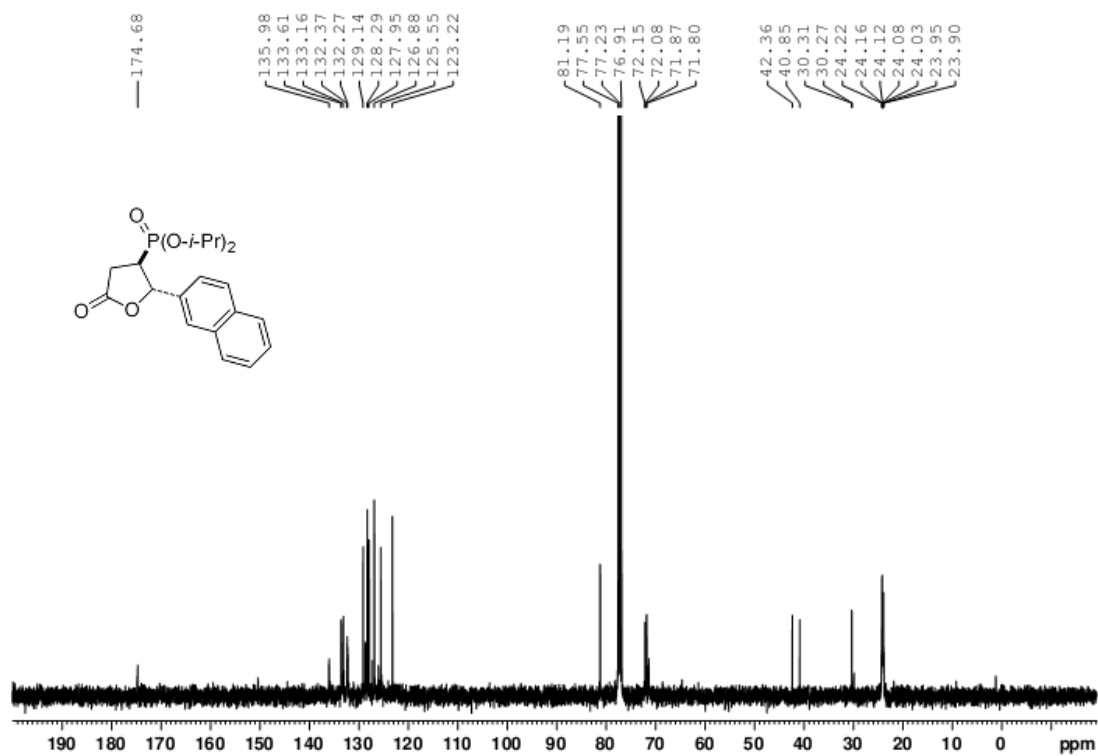

5k

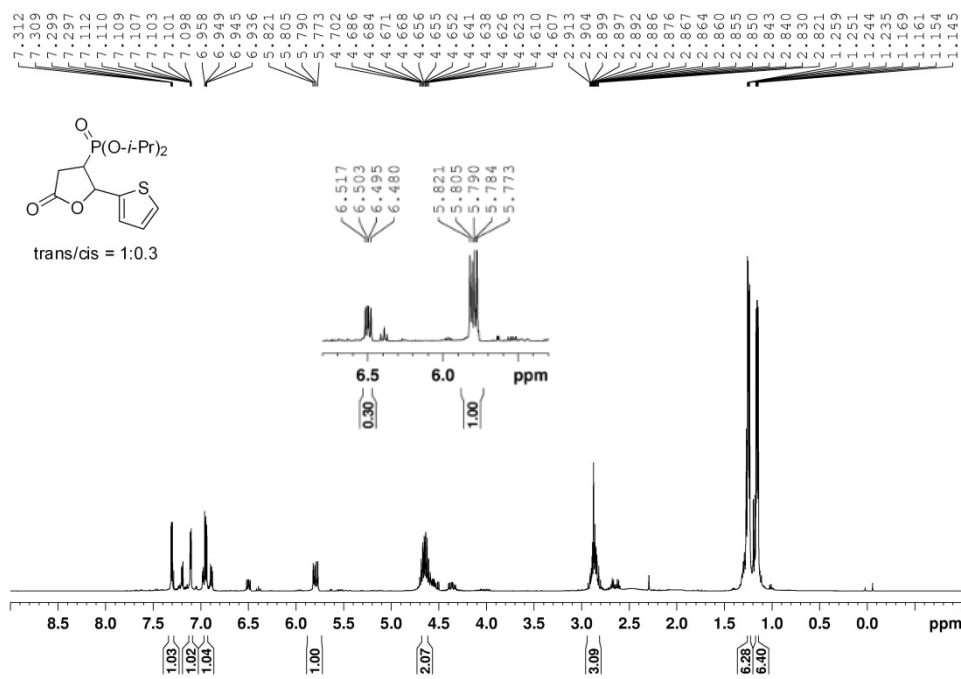

5k

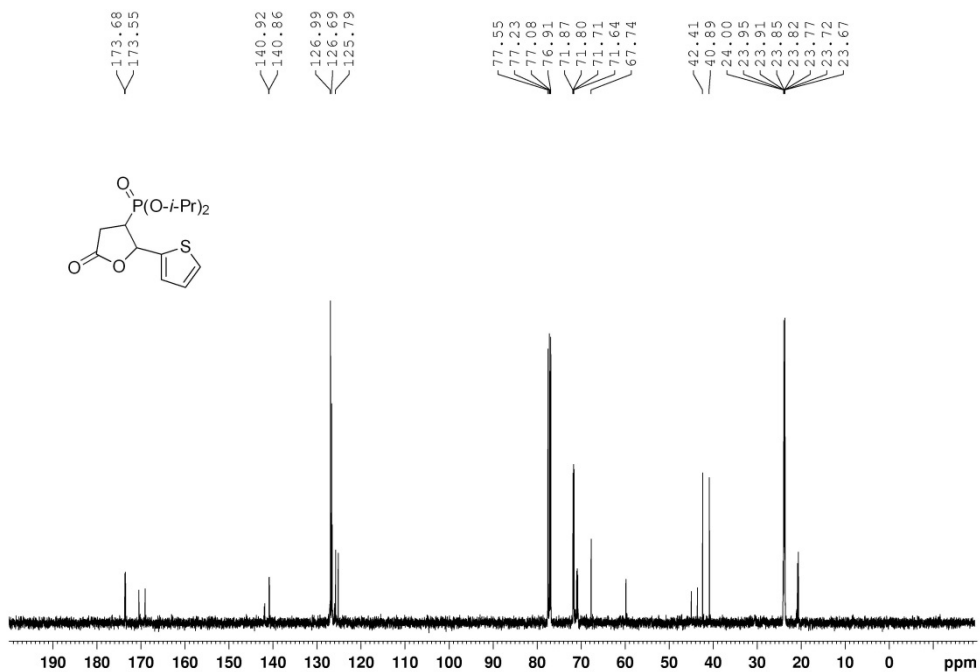



51

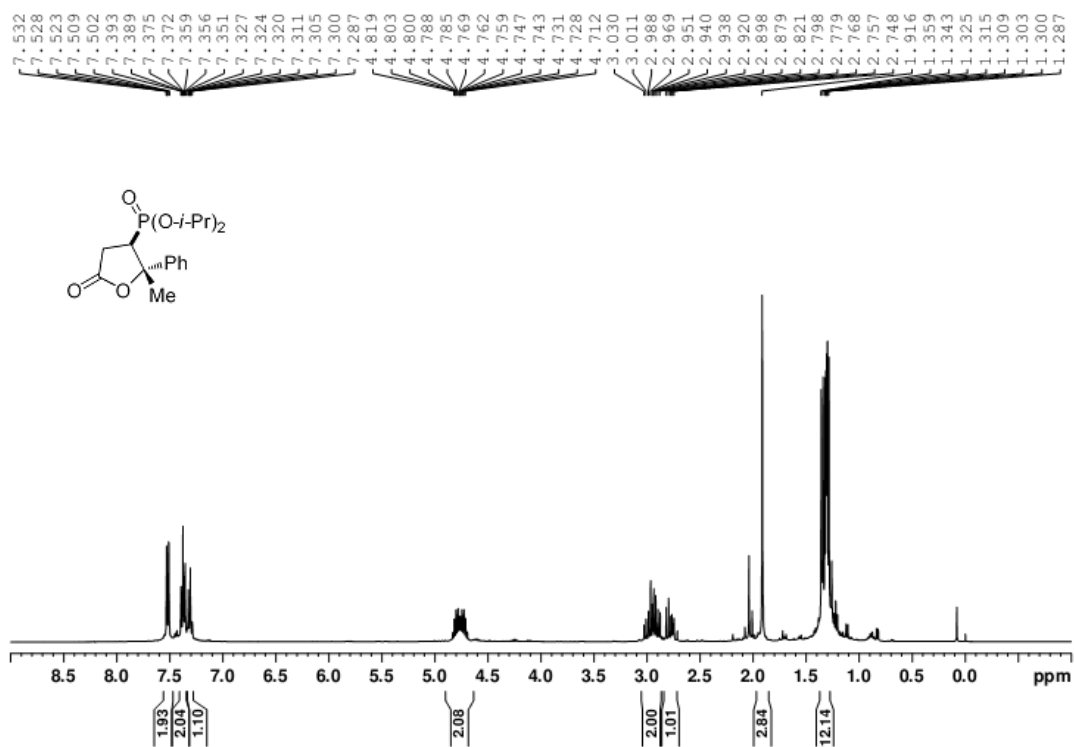

51

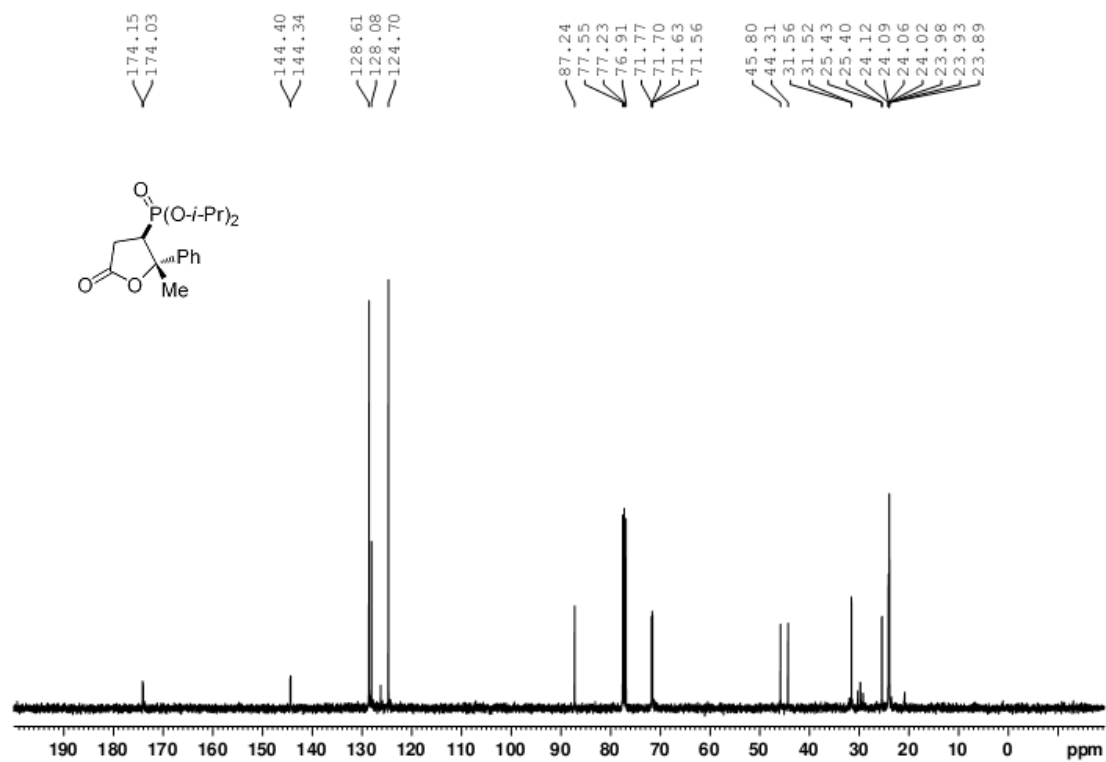

5m

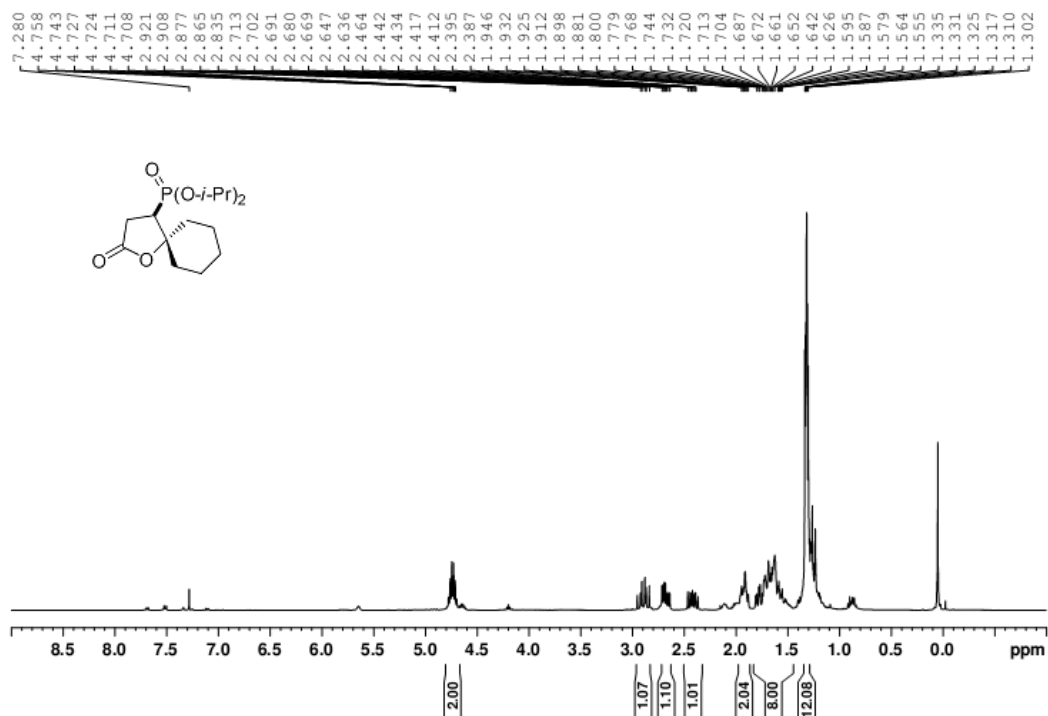

5m

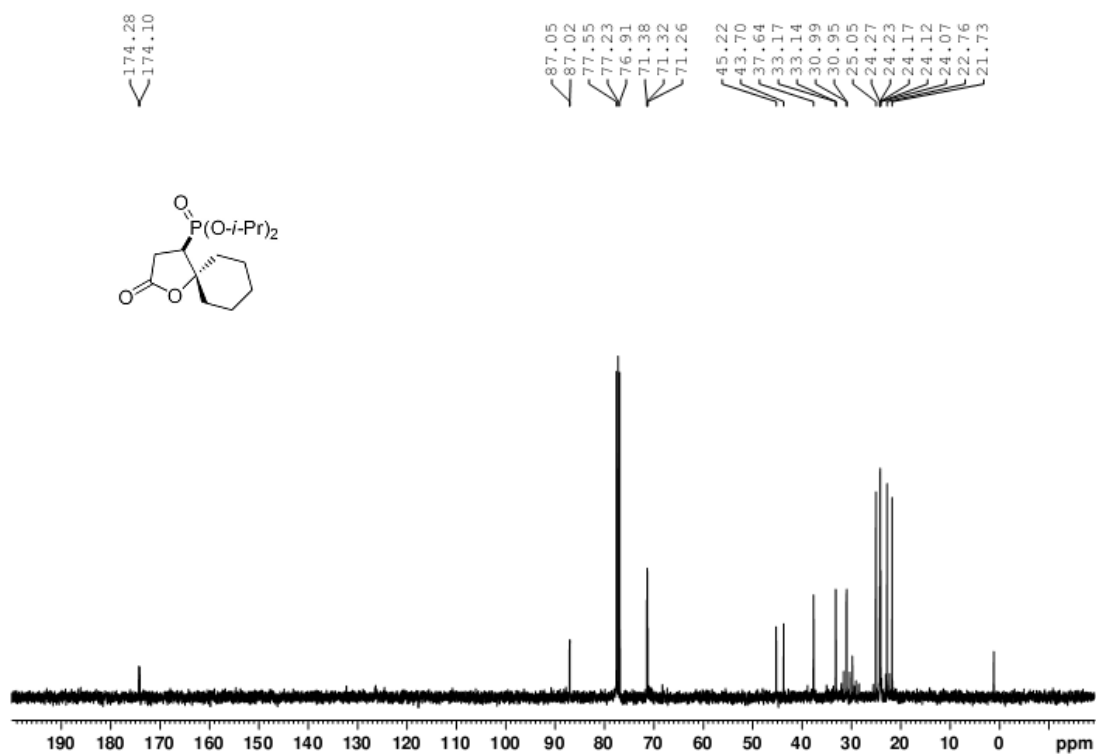

5n

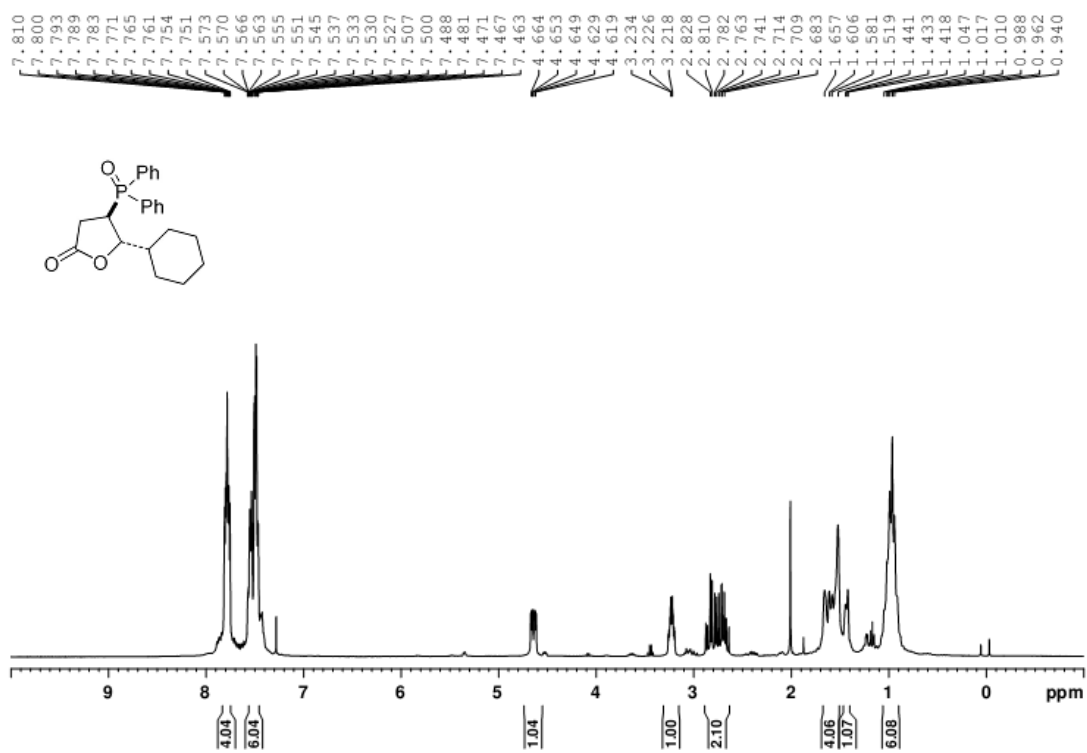

5n

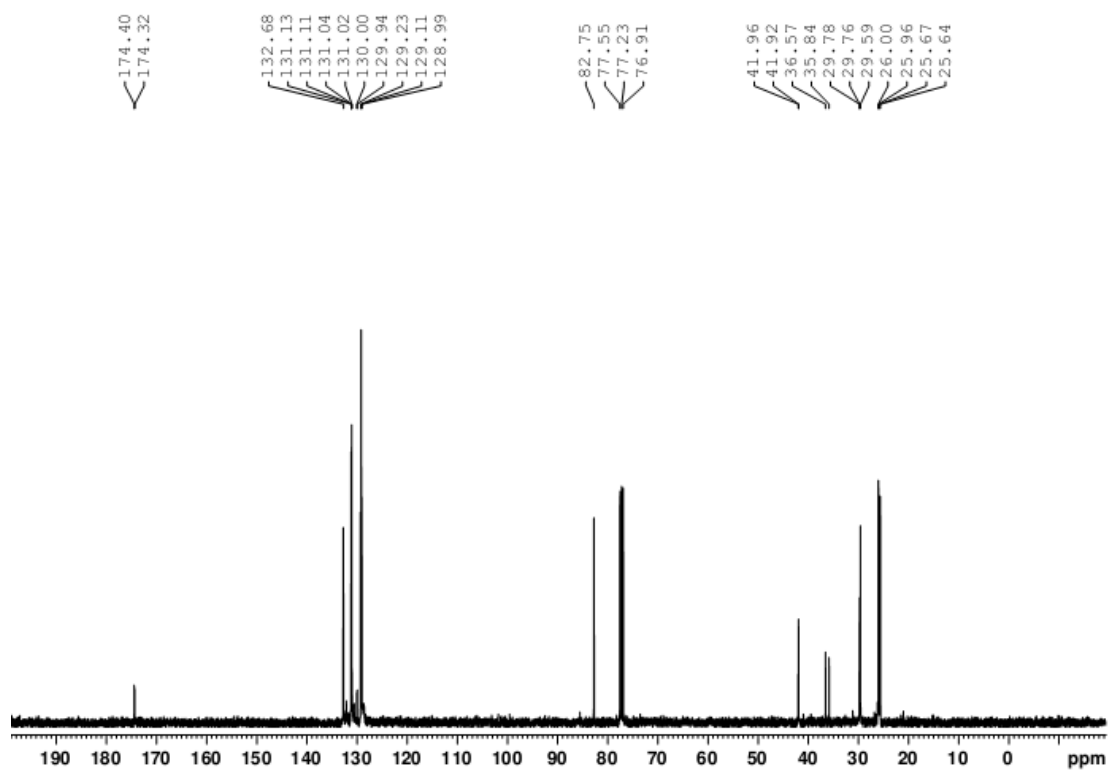

5o

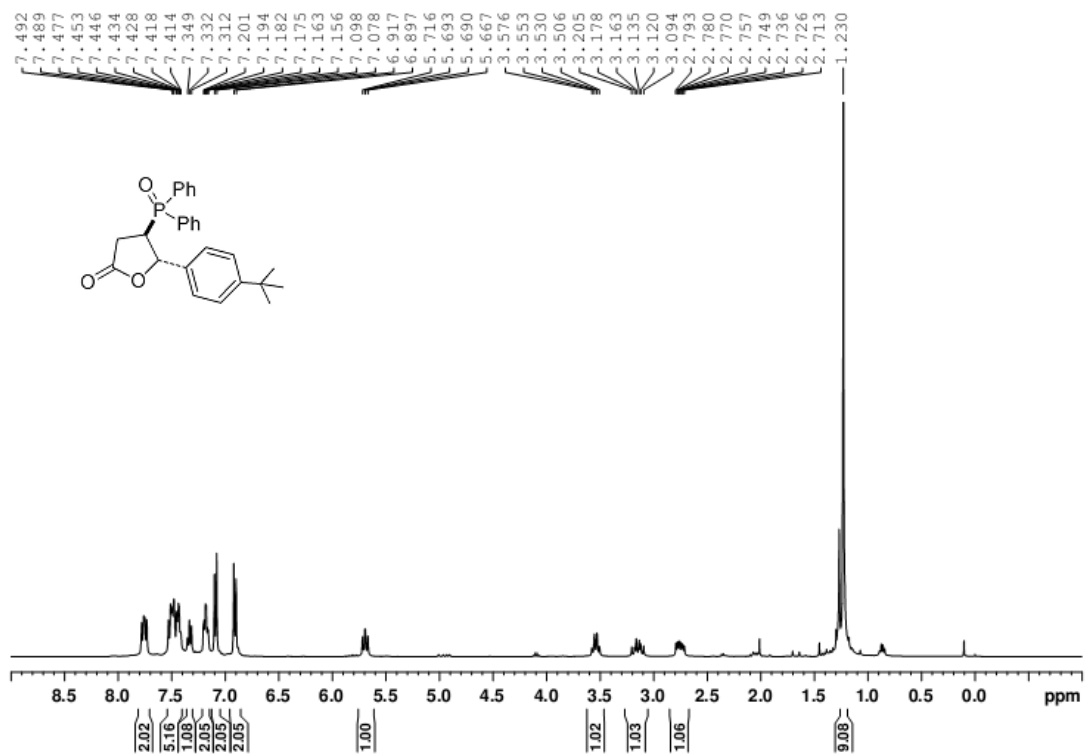

5o

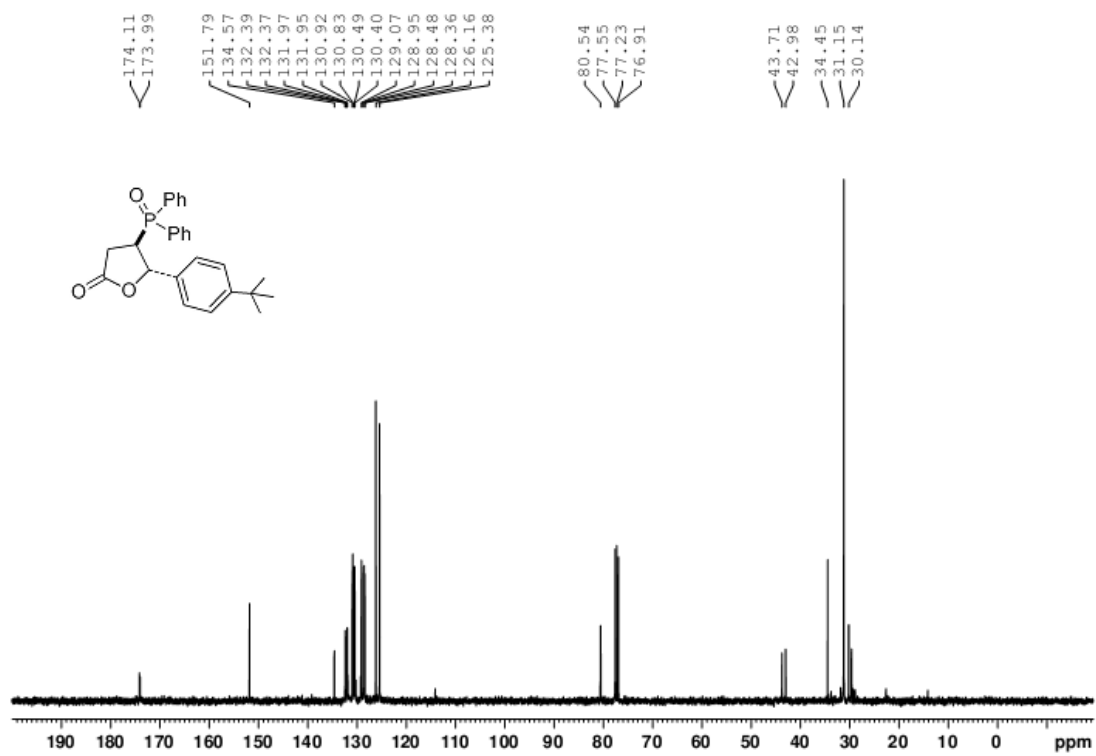

5p

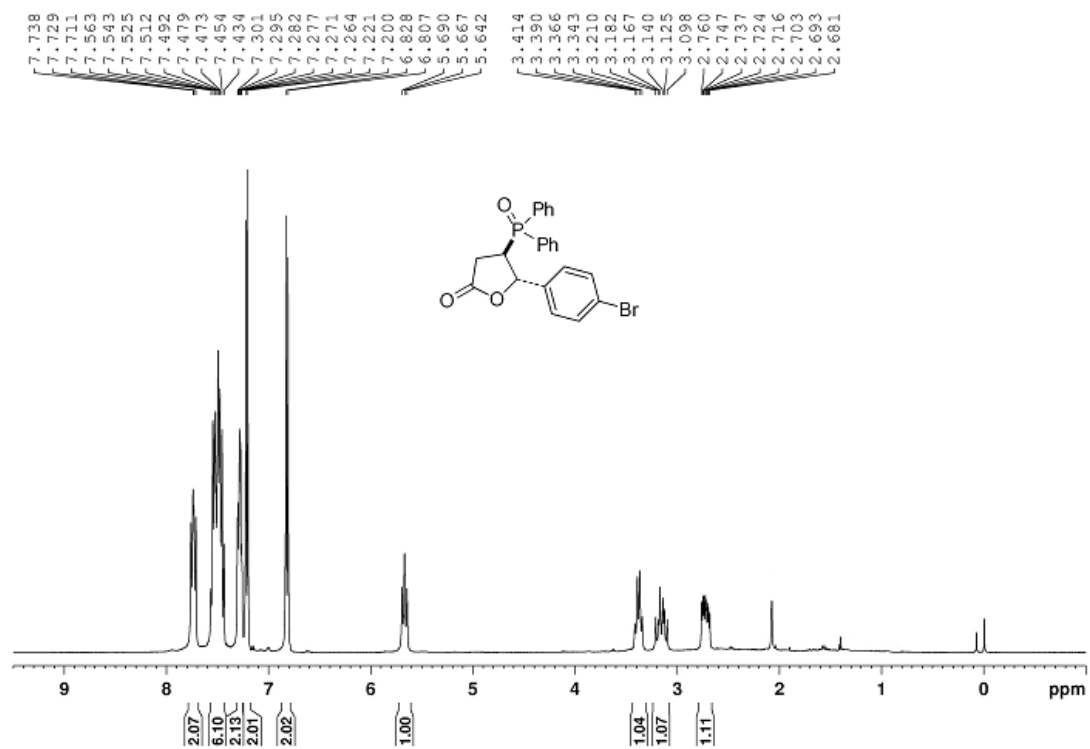

5p

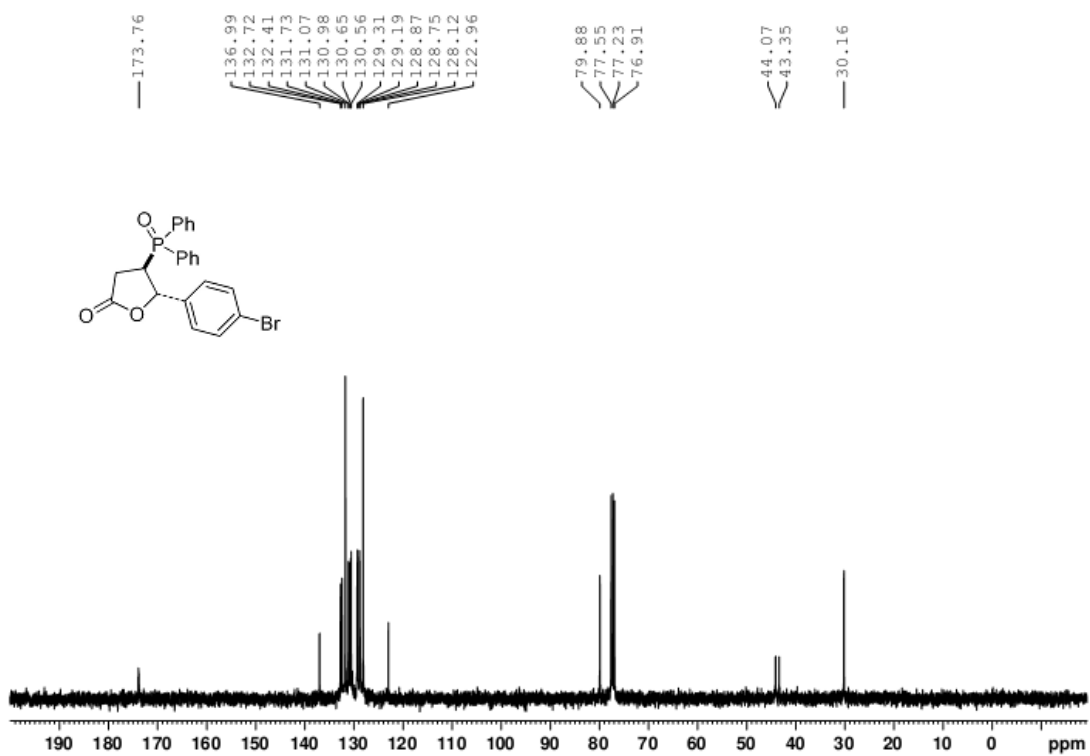

5q

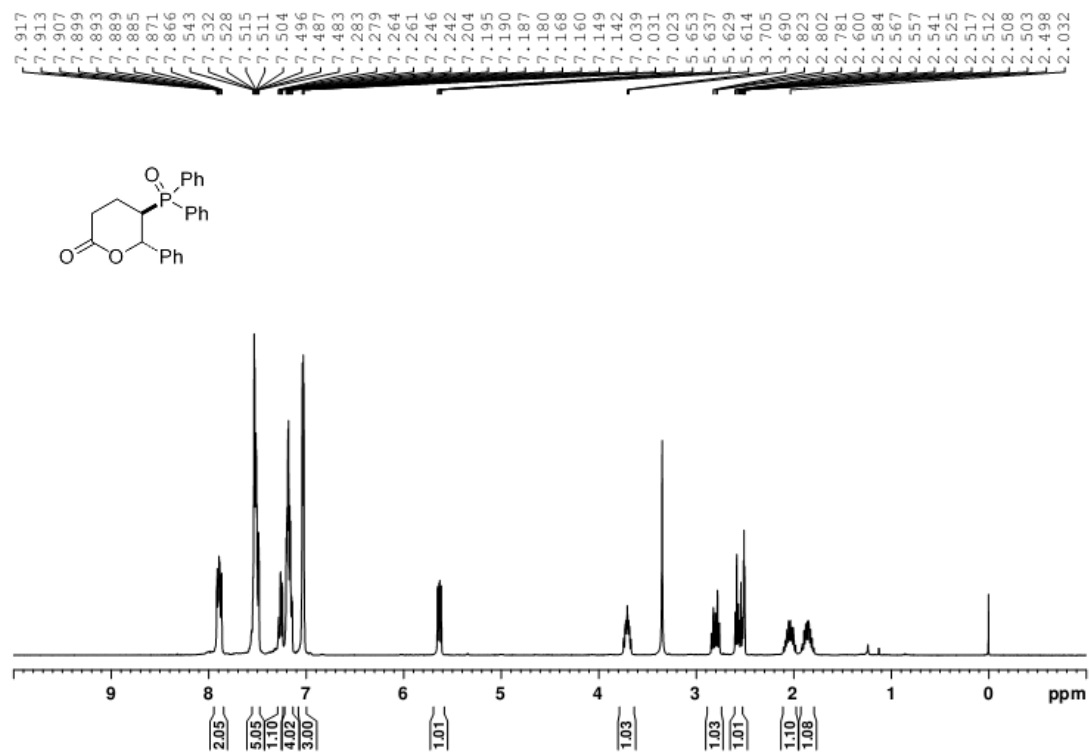

5q

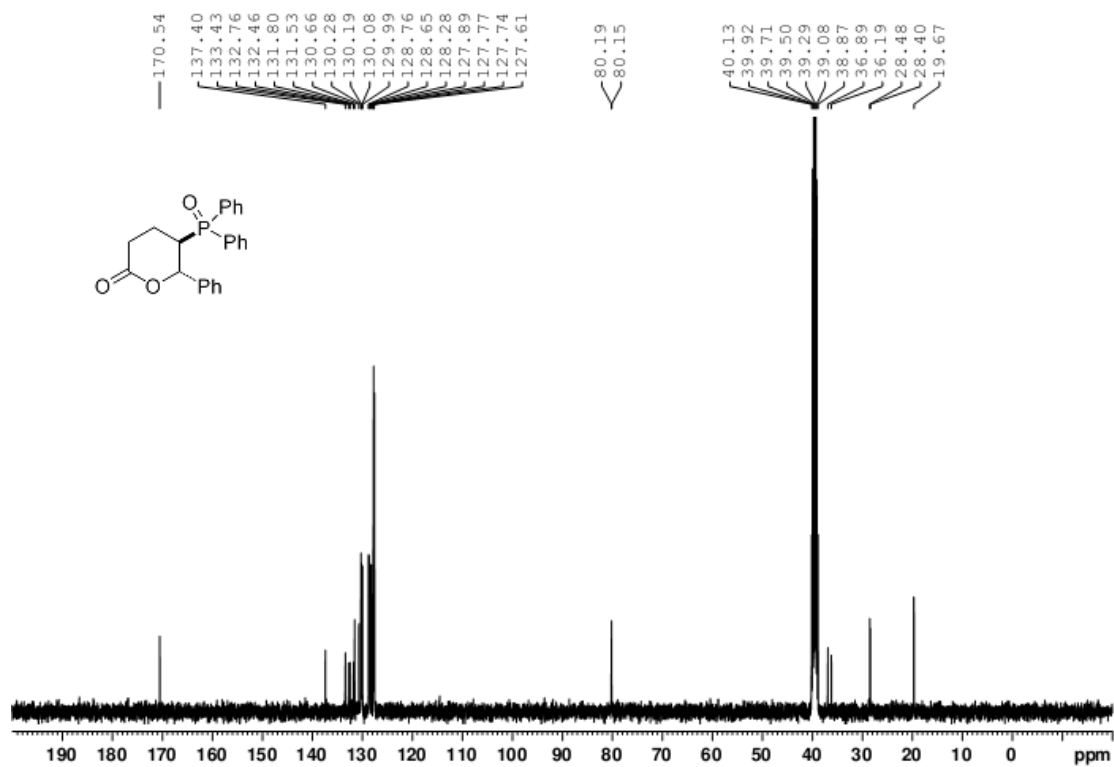

5r

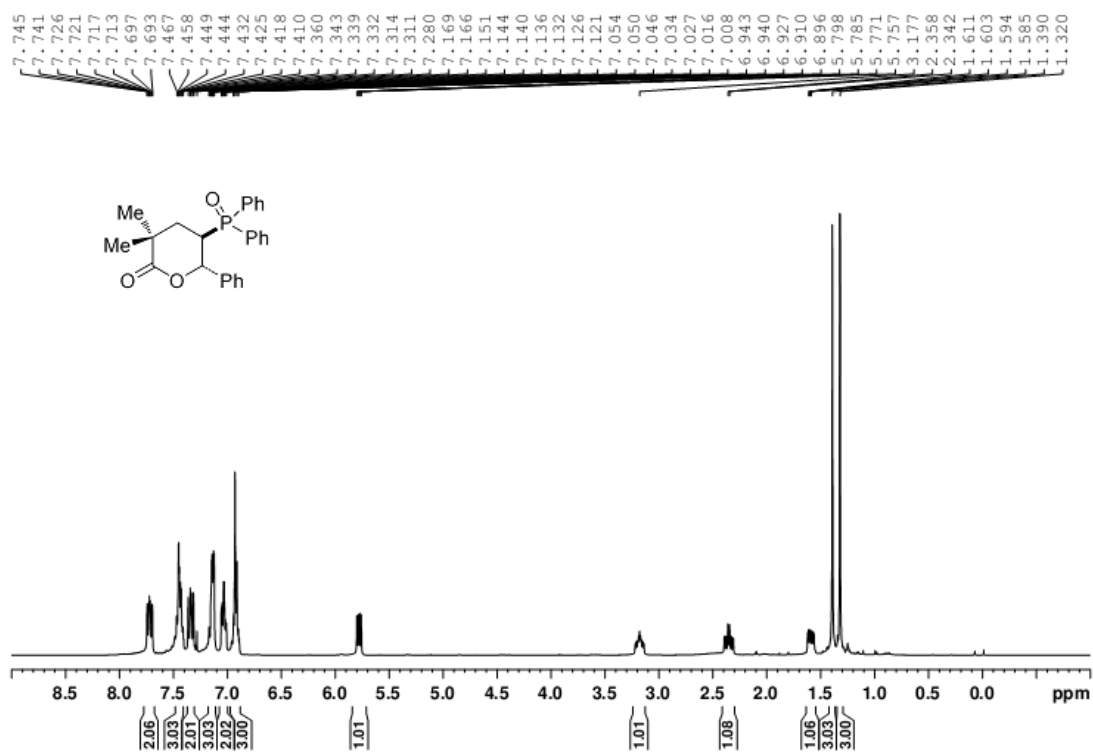

5r

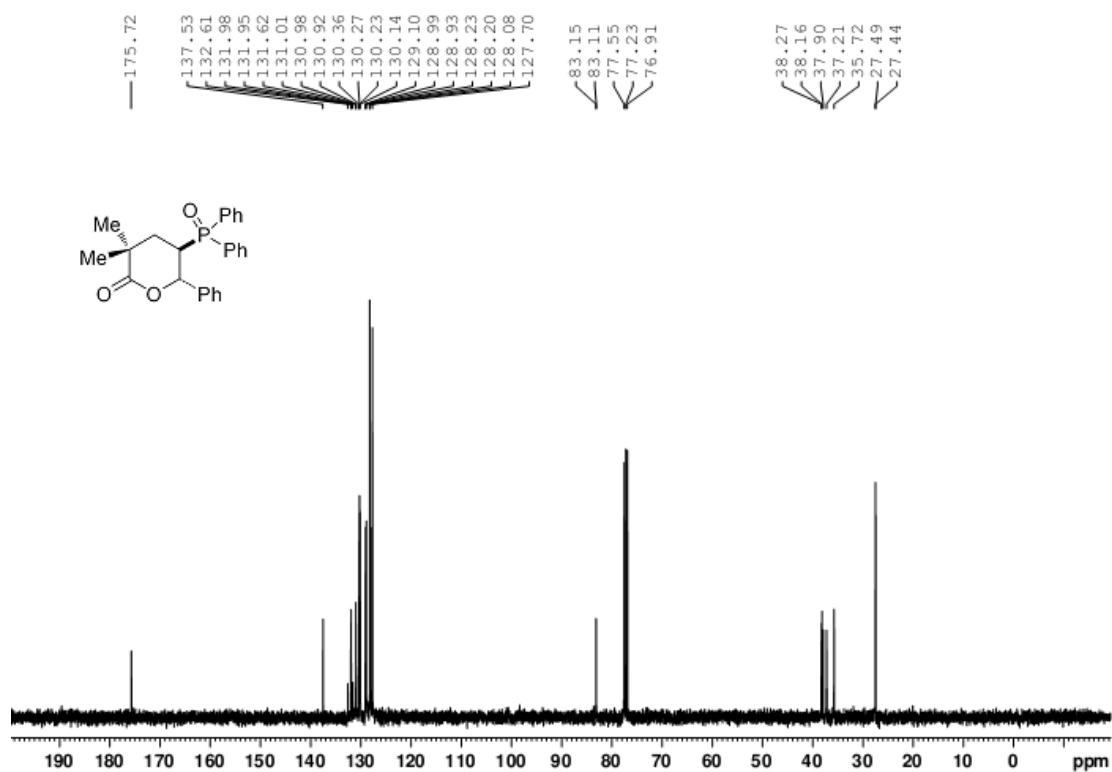

5s

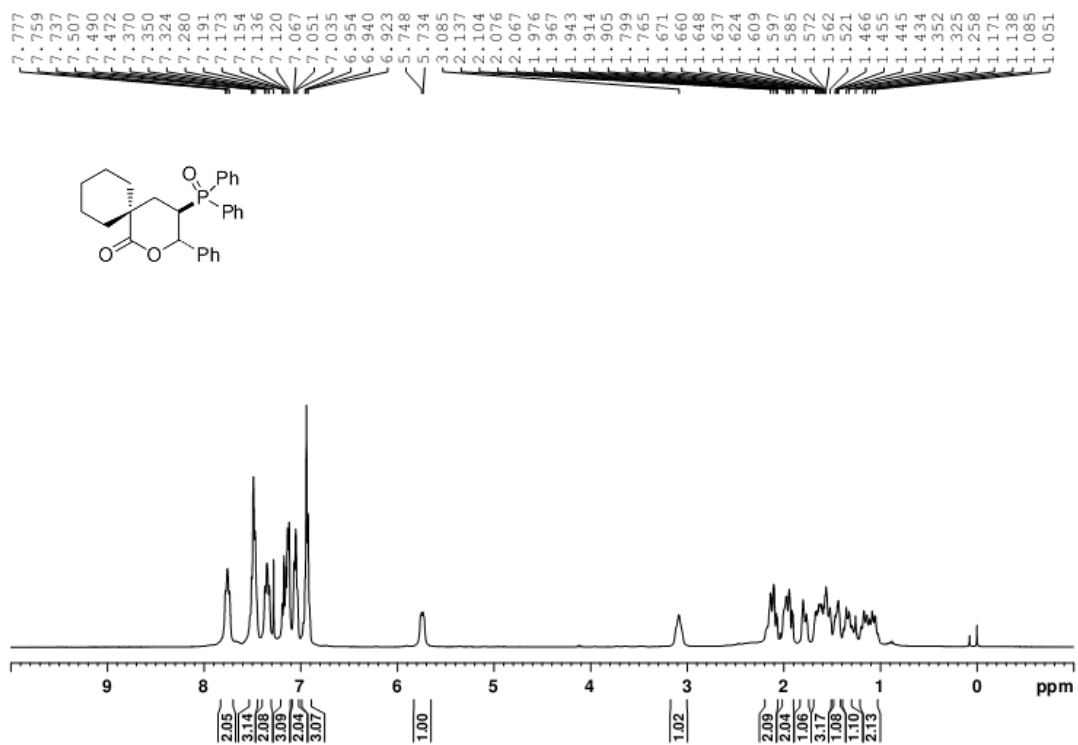

5s

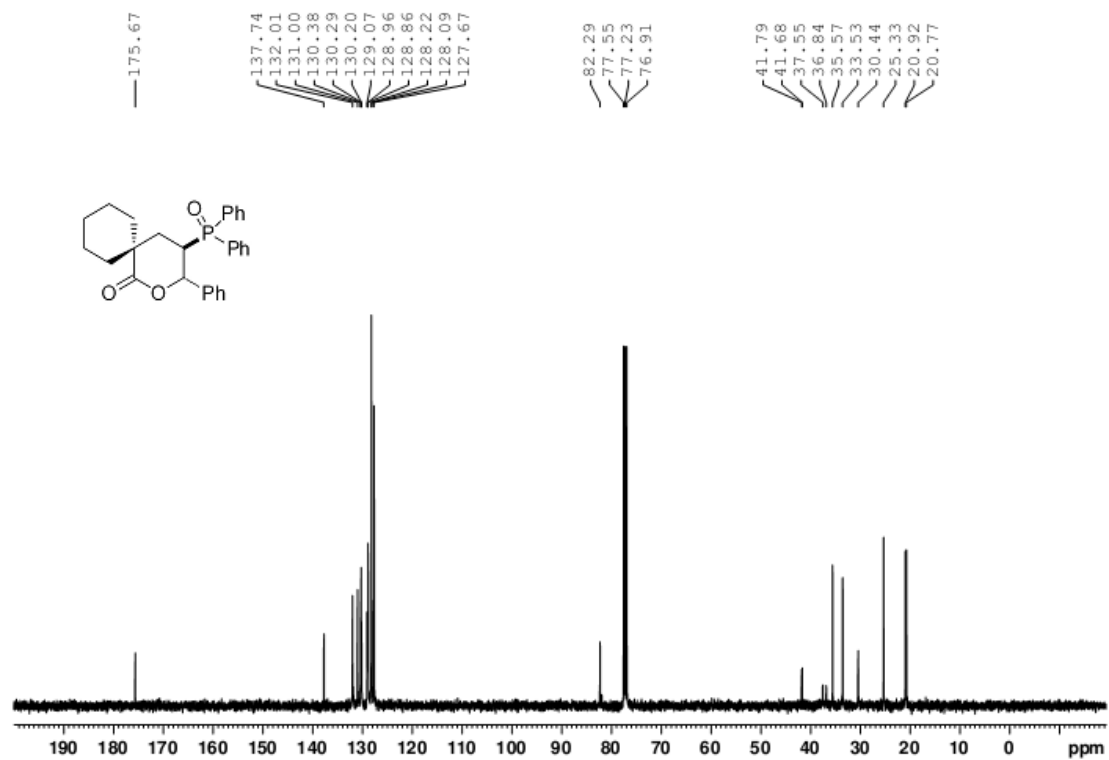



5t

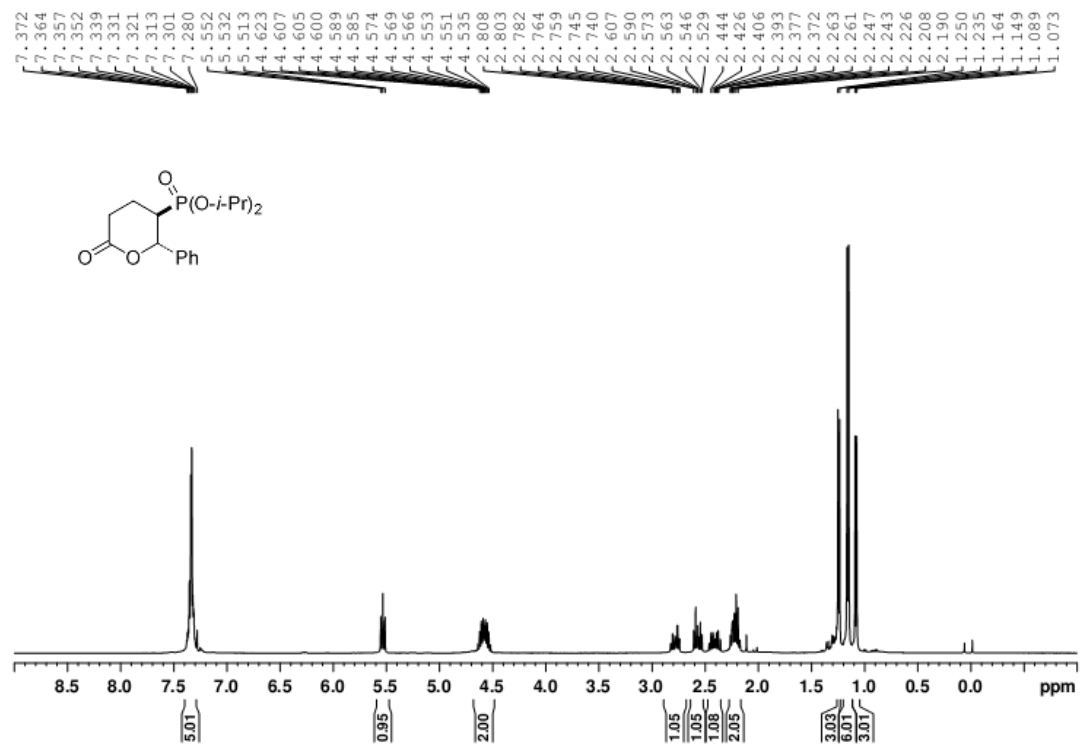

5t

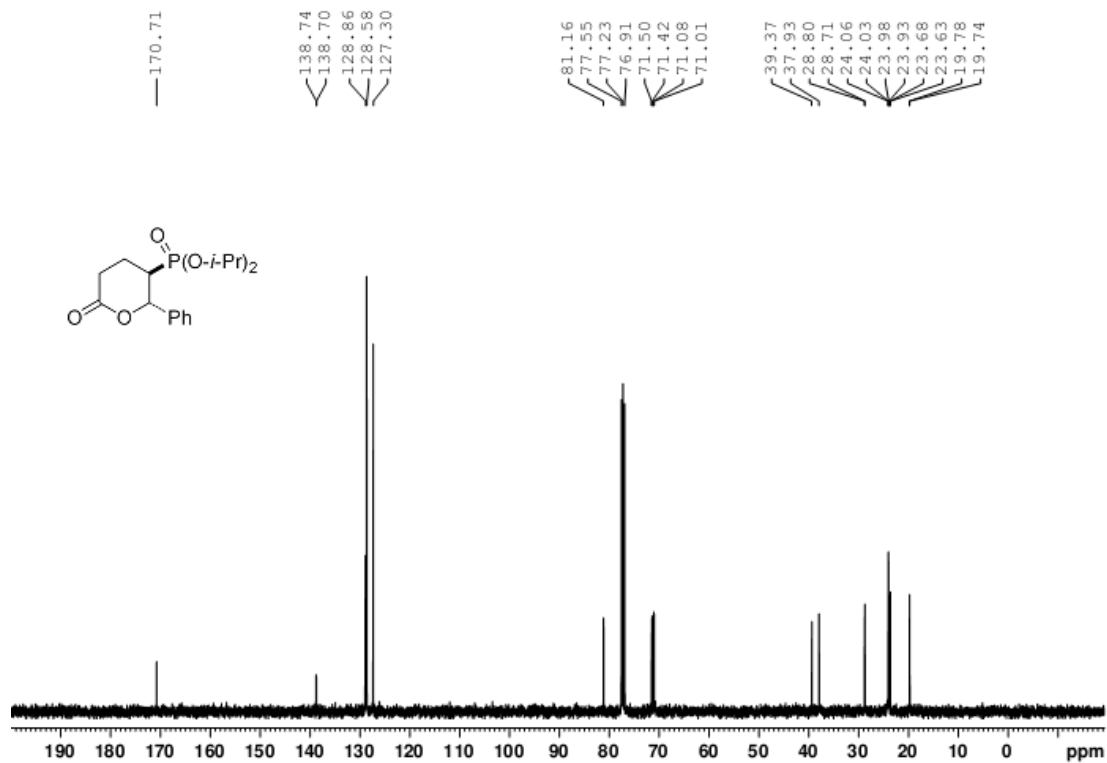

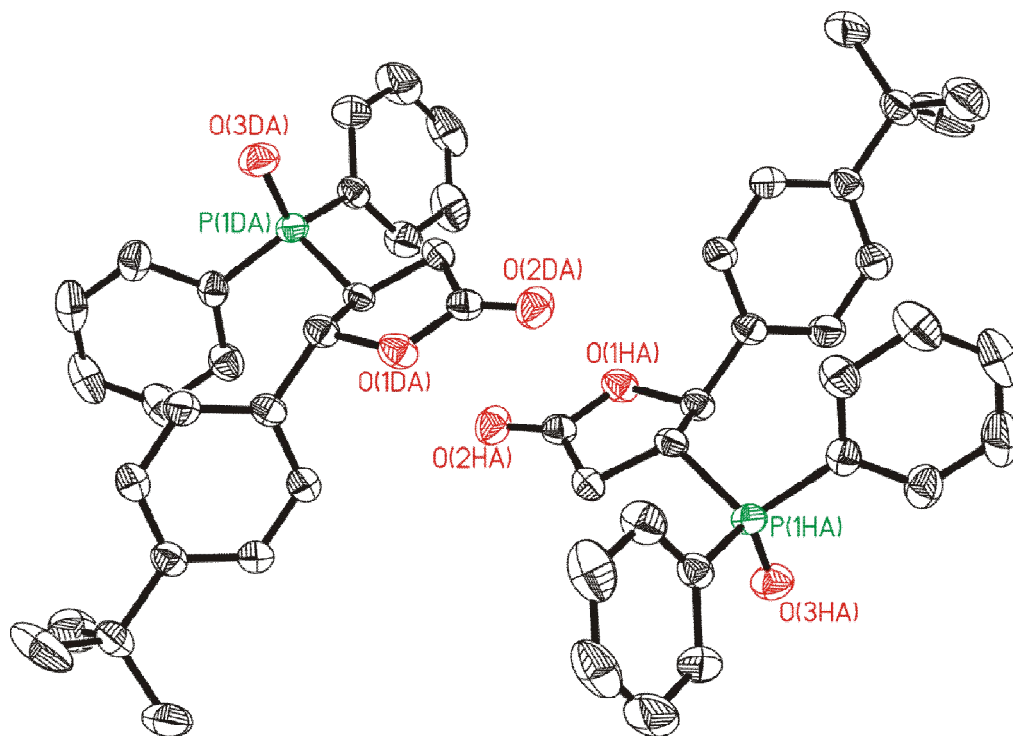

**Figure 1.** Single-crystal X-ray analysis of **5o**.
